# Supplementary material for: Targeting Anti-Angiogenic VEGF165b–VEGFR1 Signaling Promotes Nitric Oxide Independent Therapeutic Angiogenesis in Preclinical Peripheral Artery Disease Models
Source: MDPI journal article supplement (doi:10.3390/cells11172676), 2022-08-28

**Figure S1**

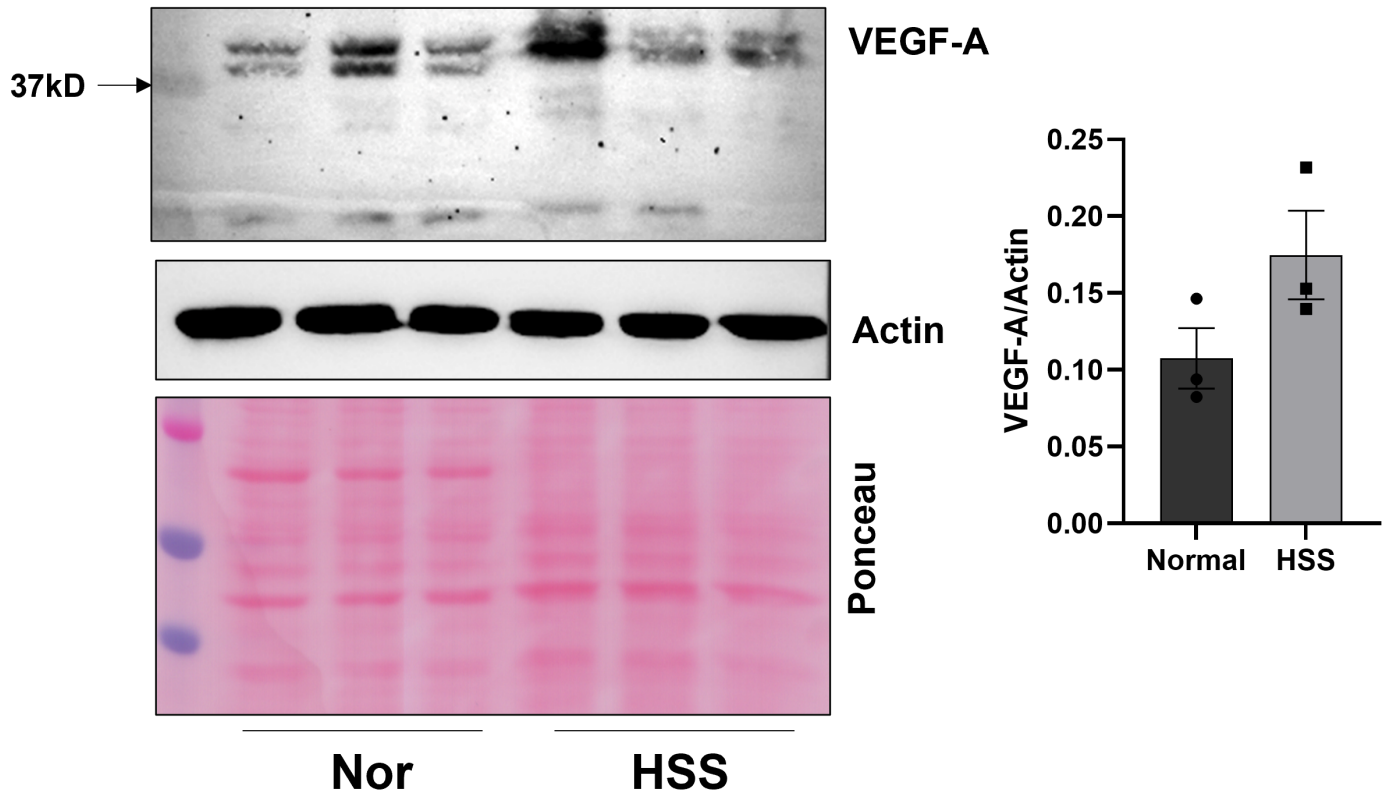

**Figure S1.** Total VEGF-A levels in normal vs. HSS HUVECs. Western blot analysis of VEGF-A using a pan-VEGF-A antibody that recognizes all the VEGF-A isoforms (Pro- and Anti-Angiogenic VEGF-A isoforms) in normal (Nor) and HSS (Hypoxia Serum Starved, for 24h) HUVECs. n=3. Unpaired T-Test. \*P<0.05 considered significant. Data Mean±SEM

## Figure S2: HSS HUVECs

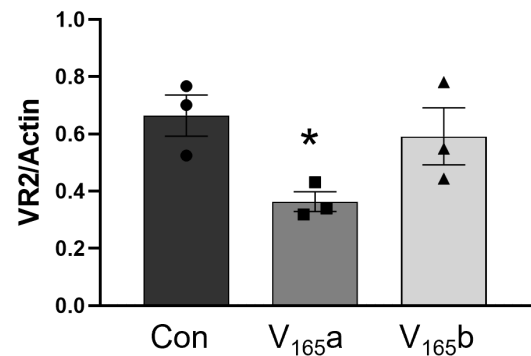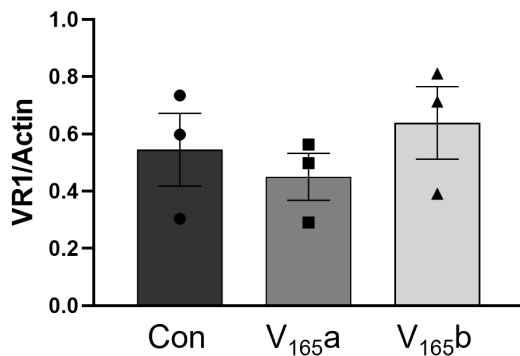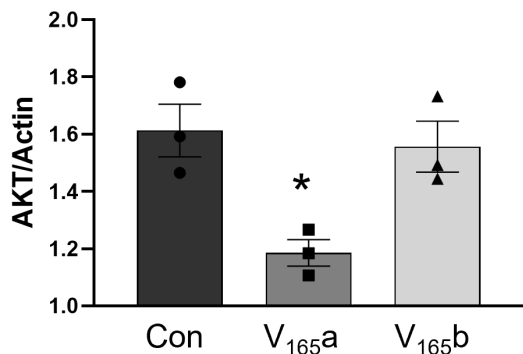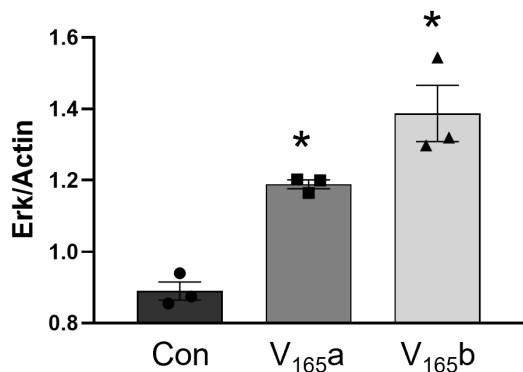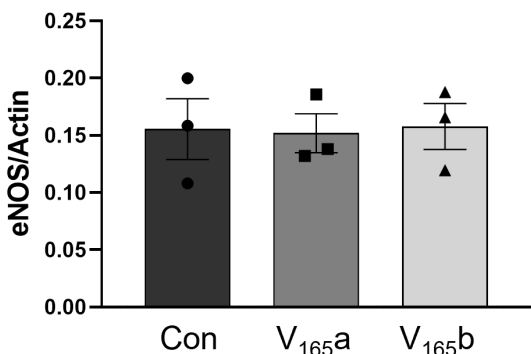

**Figure S2.** VEGF<sub>165</sub>a and VEGF<sub>165</sub>b differentially regulate total VEGFR2, AKT and ERK levels: Western blot analysis of VEGFR2 (VR2), AKT, ERK, eNOS, VR1 in HSS HUVECs treated with VEGF<sub>165</sub>a (V<sub>165</sub>a) or VEGF<sub>165</sub>b (V<sub>165</sub>b). n=3, One-way ANOVA with Bonferroni select pair comparison. \*P<0.05 considered significant. Data Mean±SEM

## Figure S3

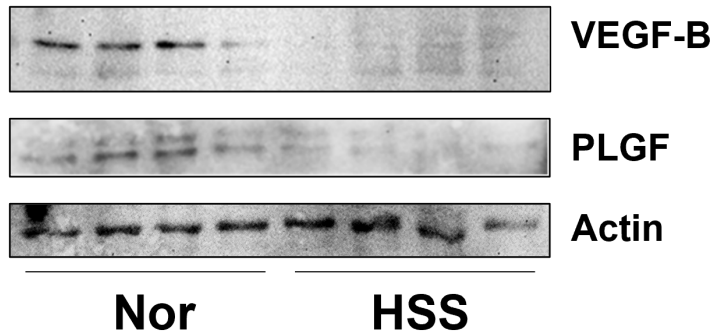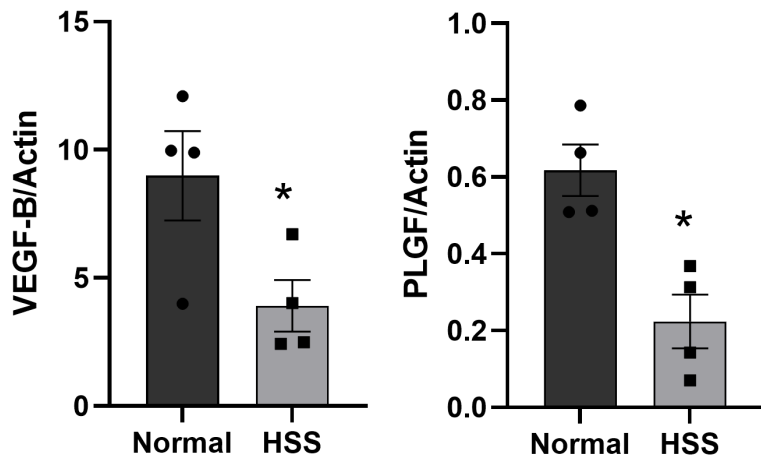

**Figure S3.** HSS decreases VEGF-B and PLGF levels in HUVECs: Western blot analysis of VEGF-B and PLGF in normal and HSS HUVECs. n=4, Unpaired T-test. \*P<0.05 considered significant. Data Mean $\pm$ SEM

**Figure S4**

**A**

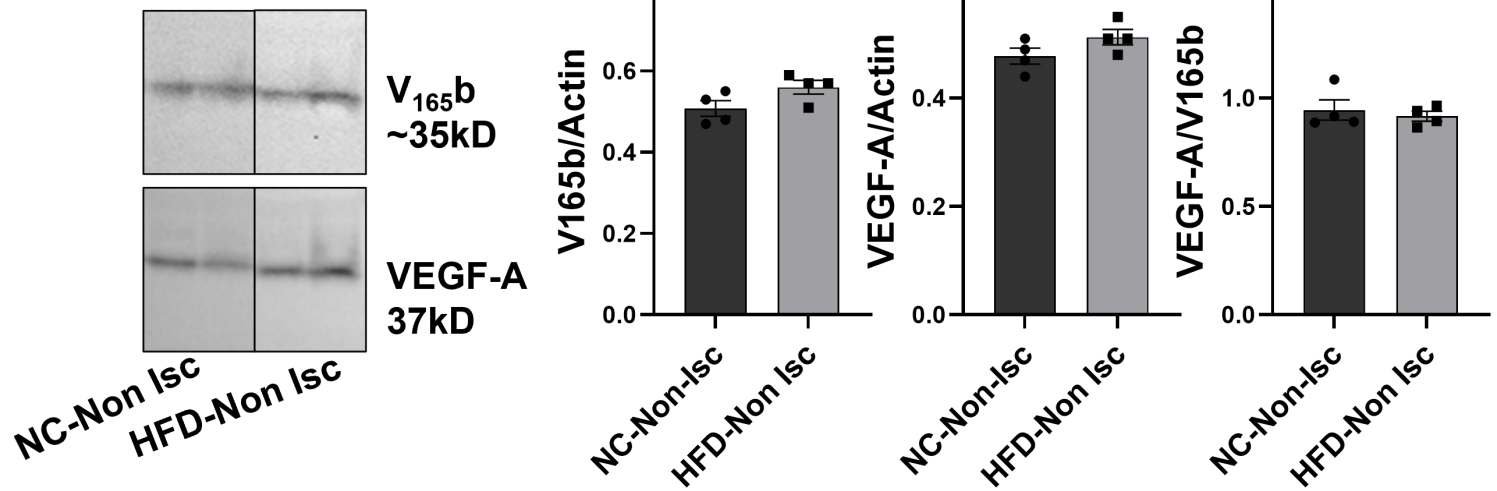

**B**

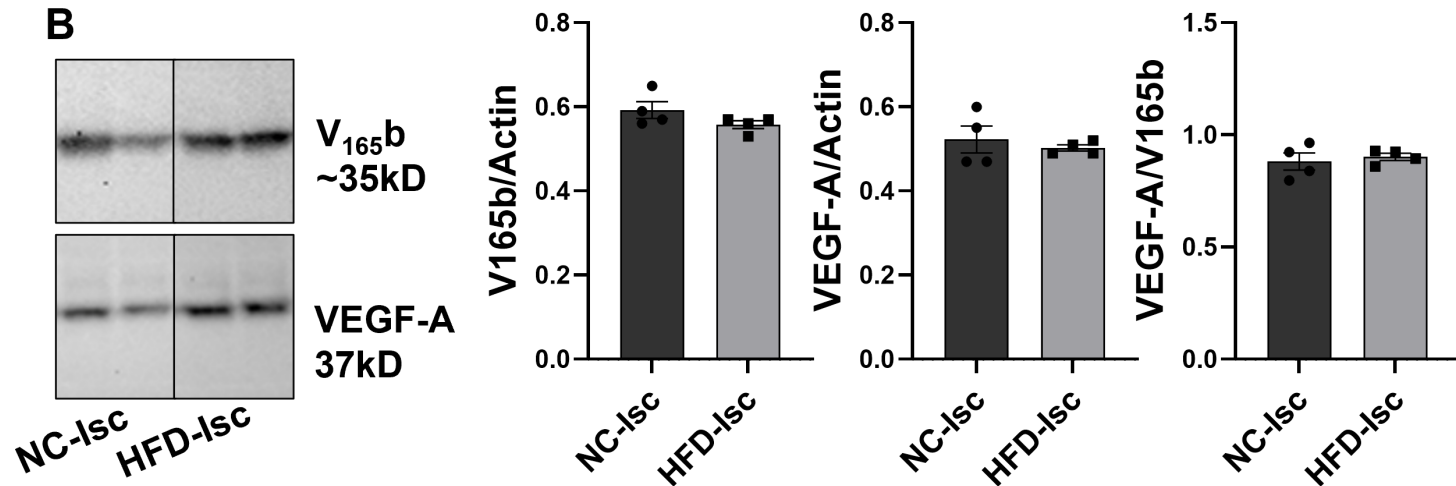

**Figure S4.** VEGF-A and VEGF<sub>165</sub>b levels in normal chow and T2D-PAD model. Immunoblot analysis of VEGF<sub>165</sub>b (V<sub>165</sub>b) and total VEGF-A expression in A) non-ischemic gastrocnemius muscle (Non-Isc) of C57BL/6 mice on normal chow (NC) or high-fat diet (HFD). n=4, Unpaired T-test, and B) ischemic gastrocnemius muscle (Isc) of C57BL/6 mice on normal chow (NC) or high-fat diet (HFD) at day-3 post-HLI. n=4, Unpaired T-test. \*P<0.05 considered significant. Data Mean±SEM.



**Figure S5: T2D-HLI**

**A**

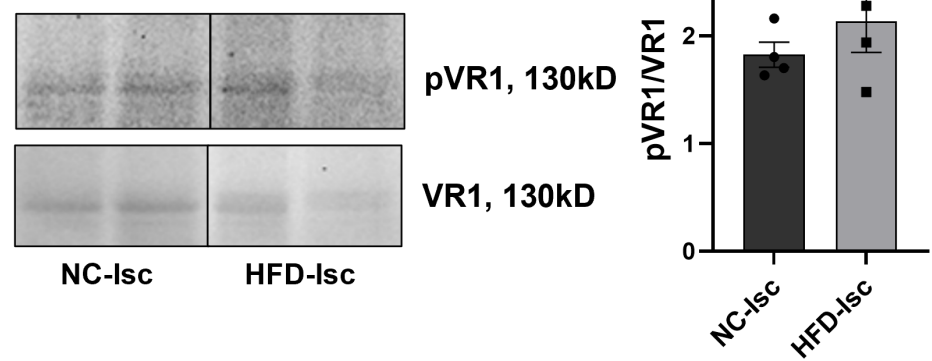

**B**

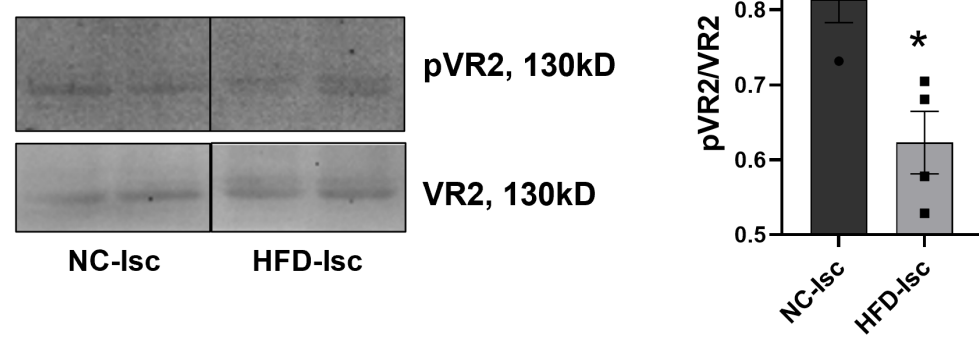

**C**

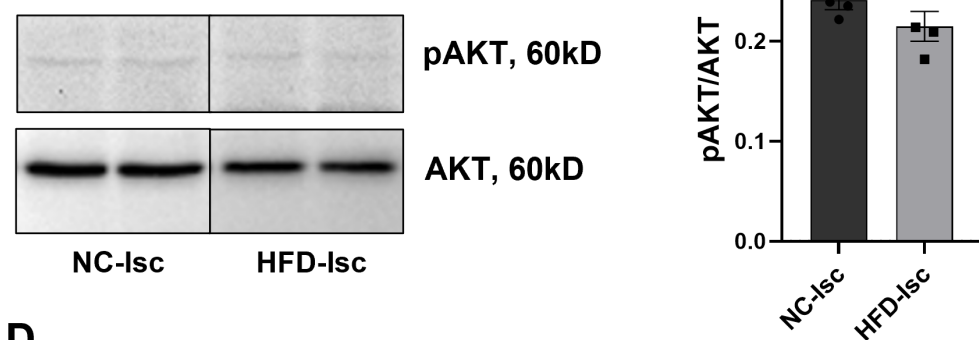

**D**

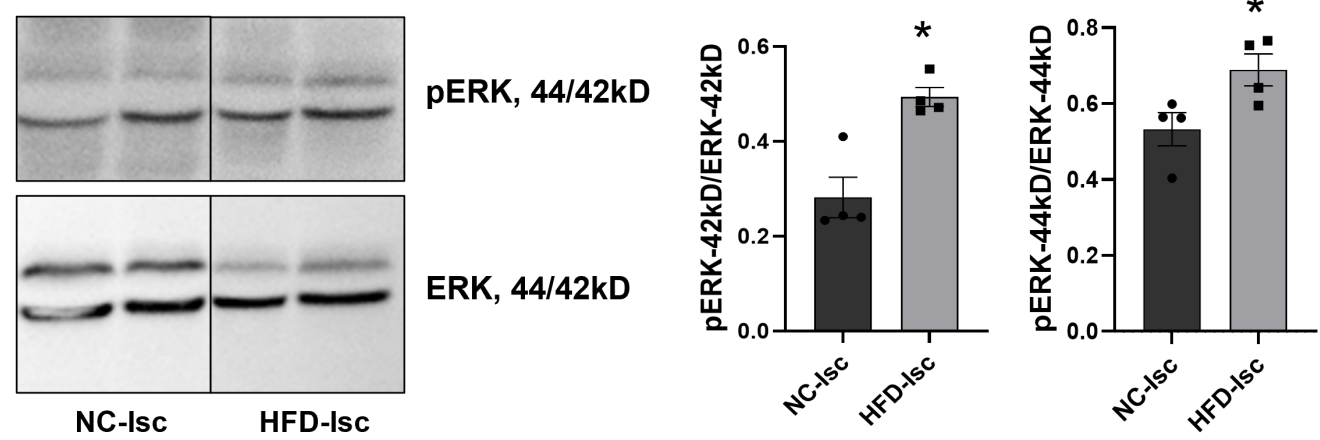

**Figure S5.** T2D-PAD mice have lower VEGFR2 activation in ischemic muscle: A) pVEGFR1<sub>Y1333</sub> (pVR1), VEGFR1 (VR1); B) pVEGFR2, VEGFR2; C) pAKT, AKT, D) pERK, ERK in normal chow (NC) and high-fat diet (HFD) fed ischemic muscle (Isc). n=4, Unpaired T-test. \*P<0.05 considered significant. Data Mean±SEM

## Figure S6: T2D-HLI

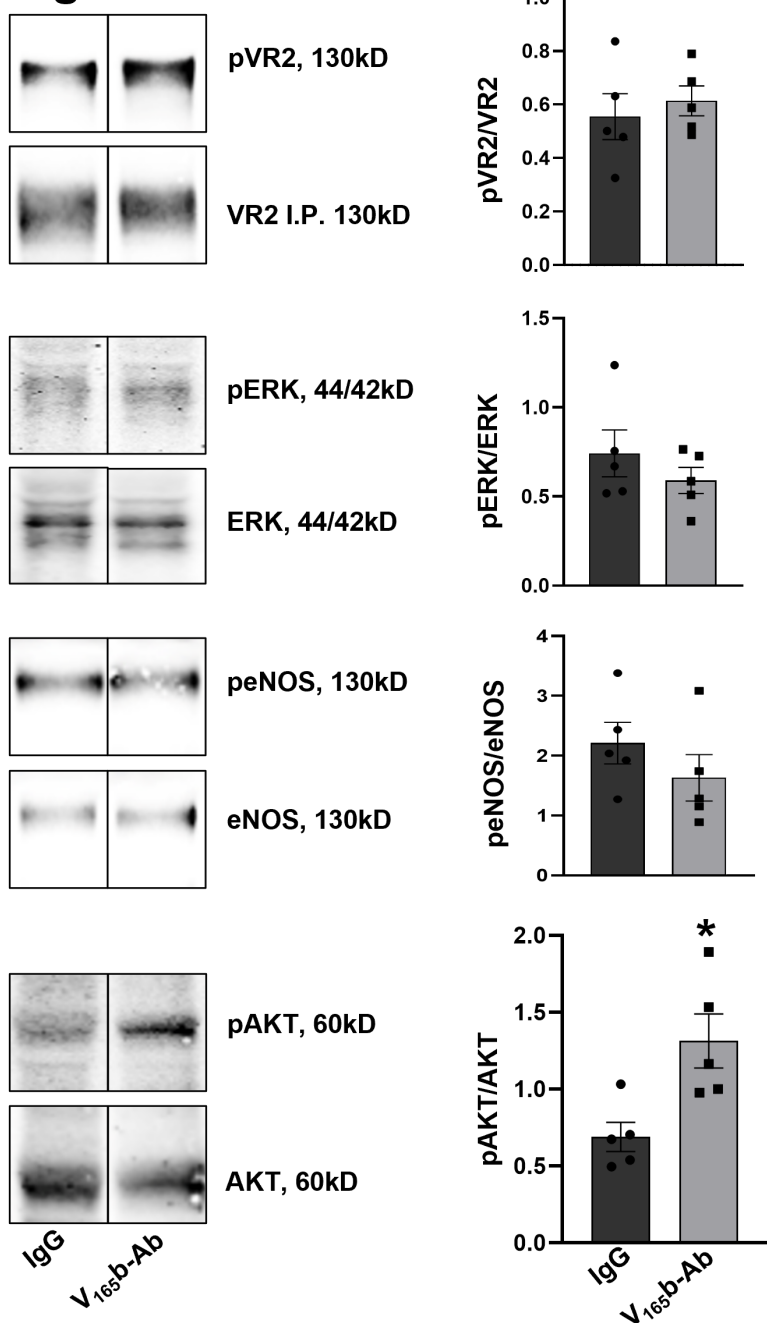

**Figure S6.** VEGF<sub>165</sub>b inhibition doesn't not induce VEGFR2-eNOS signaling in T2D-PAD model. Western blot analysis of pVEGFR2, VEGFR2; pERK, ERK; peNOS, eNOS; pAKT, AKT in IgG or VEGF<sub>165</sub>b-Ab treated high-fat diet fed ischemic muscle (Type-2 diabetic hind limb ischemia model (T2D-HLI). n=5, Unpaired T-test. \*P<0.05 considered significant. Data Mean±SEM

## Figure S7

A

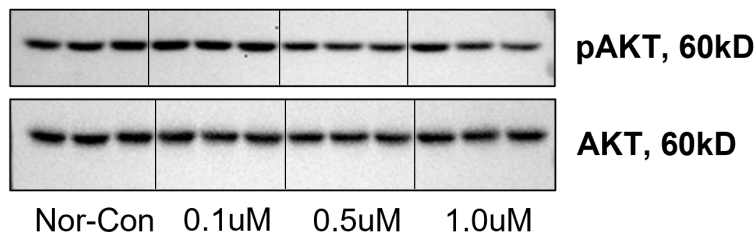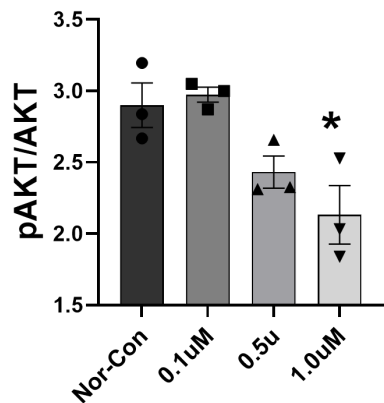

B

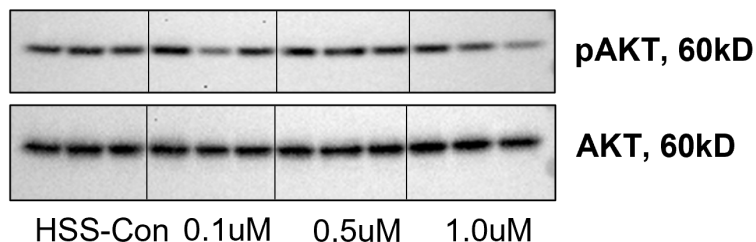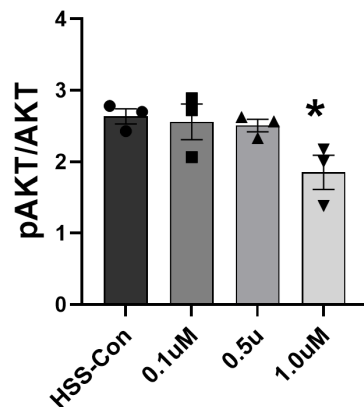

**Figure S7.** STAT3 inhibition decreases AKT activation in normal and HSS HUVECs: Western blot analysis of pAKT, AKT in A) normal or B) HSS HUVECs treated with 0.1  $\mu$ M, 0.5  $\mu$ M, 1.0  $\mu$ M STATTIC for 24h. n=3, One Way ANOVA with Dunnett's post-test. \*P<0.05 considered significant. Data Mean $\pm$ SEM

## Figure S8

A

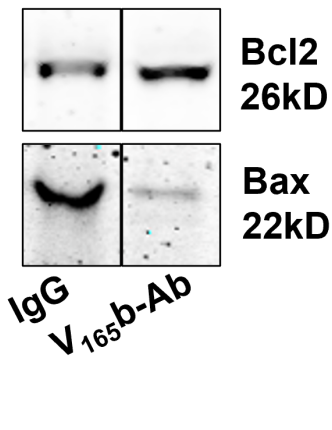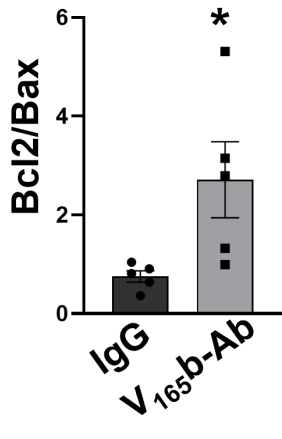

B

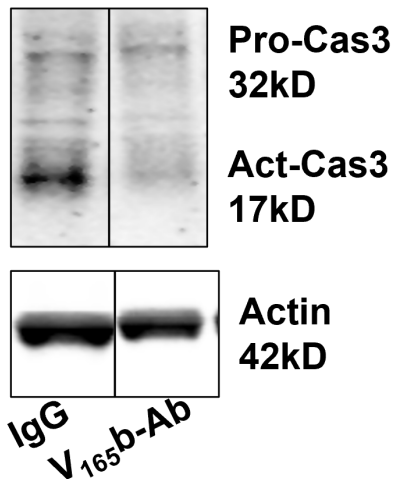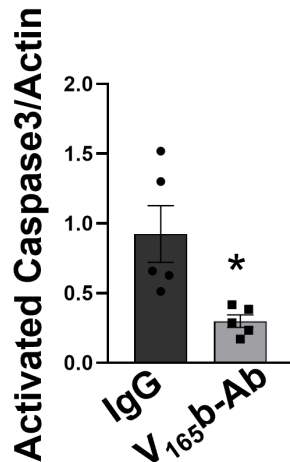

**Figure S8.** VEGF<sub>165</sub>b-inhibition inhibits apoptosis T2D-PAD model: Immunoblot analysis of apoptotic protein expression levels including Bcl2, Bax, and activated Caspase-3 in HFD-ischemic gastrocnemius muscle treated with IgG or V<sub>165</sub>b-Ab at day-3 post-HLI. n=5. Unpaired T-test. \*P<0.05 considered significant. Data Mean±SEM

**Figure S9**

**A**

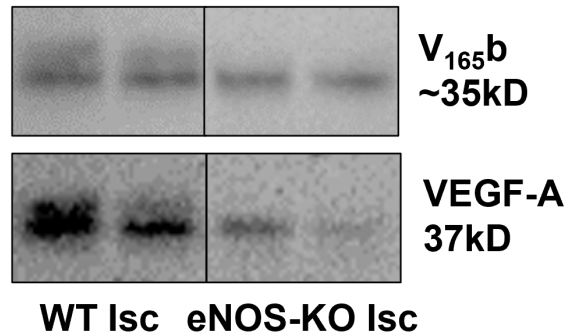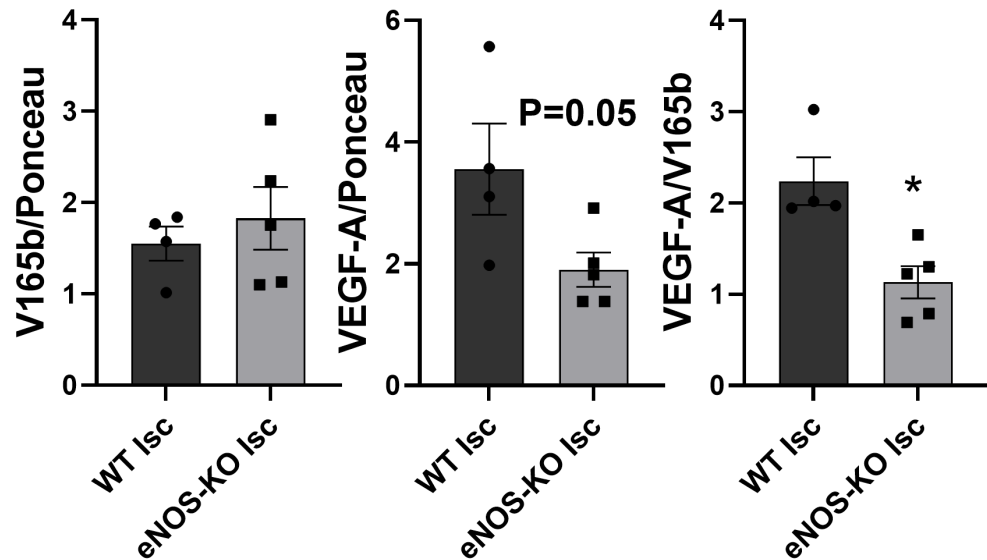

**B**

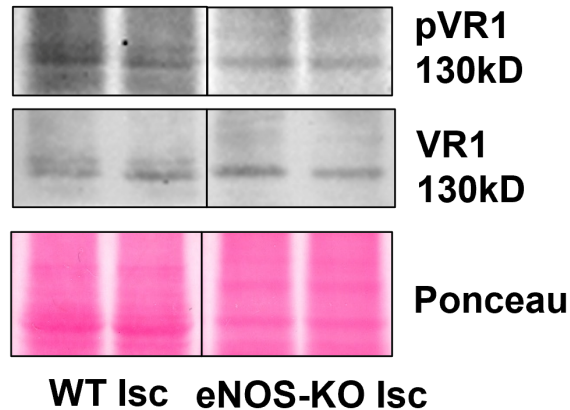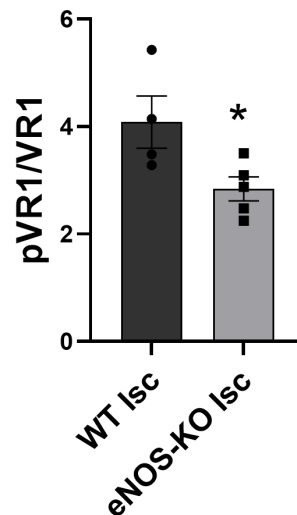

**Figure S9.** VEGF<sub>165</sub>b, VEGF-A levels, and VEGFR1 activation in eNOS-KO mice in experimental PAD. A) Immunoblot analysis of VEGF<sub>165</sub>b (V<sub>165</sub>b) and total VEGF-A levels; pVR1 and VR1 in wild type controls and eNOS-KO mice ischemic gastrocnemius muscle at day-3 post-HLI. n≥5, Unpaired T-test. \*P<0.05 considered significant. Data Mean±SEM

# Figure S10: eNOS-KO-HLI

A

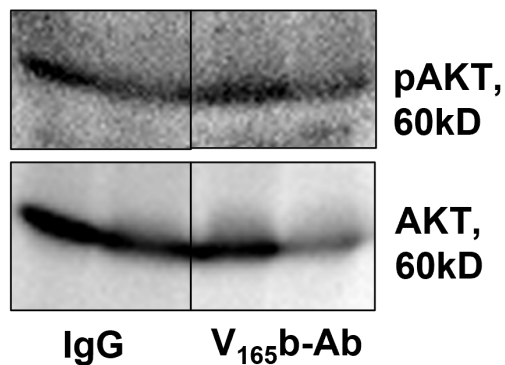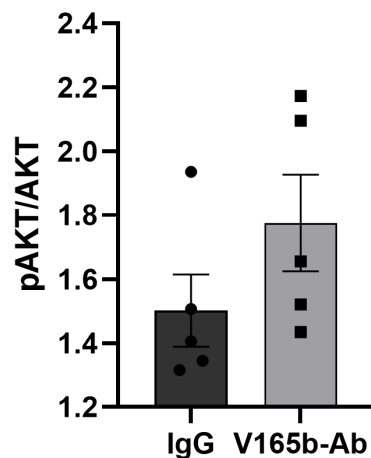

B

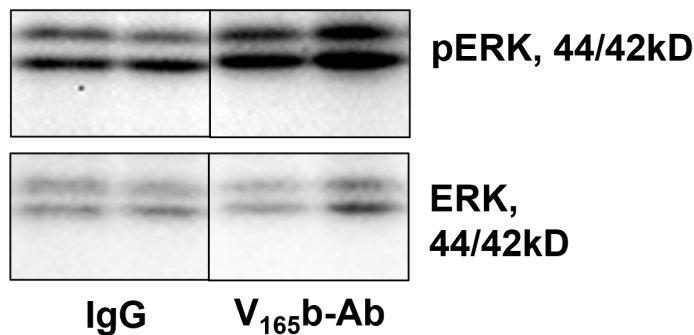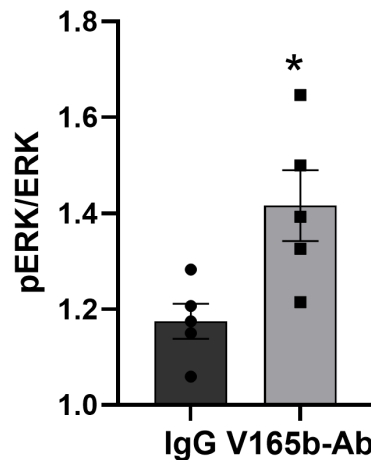

**Figure S10.** VEGF<sub>165</sub>b inhibition induced ERK but not AKT activation in eNOS-KO mice ischemic muscle: Western blot analysis of A) pAKT, AKT and B) pERK, ERK in IgG or VEGF<sub>165</sub>b-Ab treated eNOS-KO mice ischemic muscle. n=5, Unpaired T-test. \*P<0.05 considered significant. Data Mean±SEM

**Figure S11**

**A**

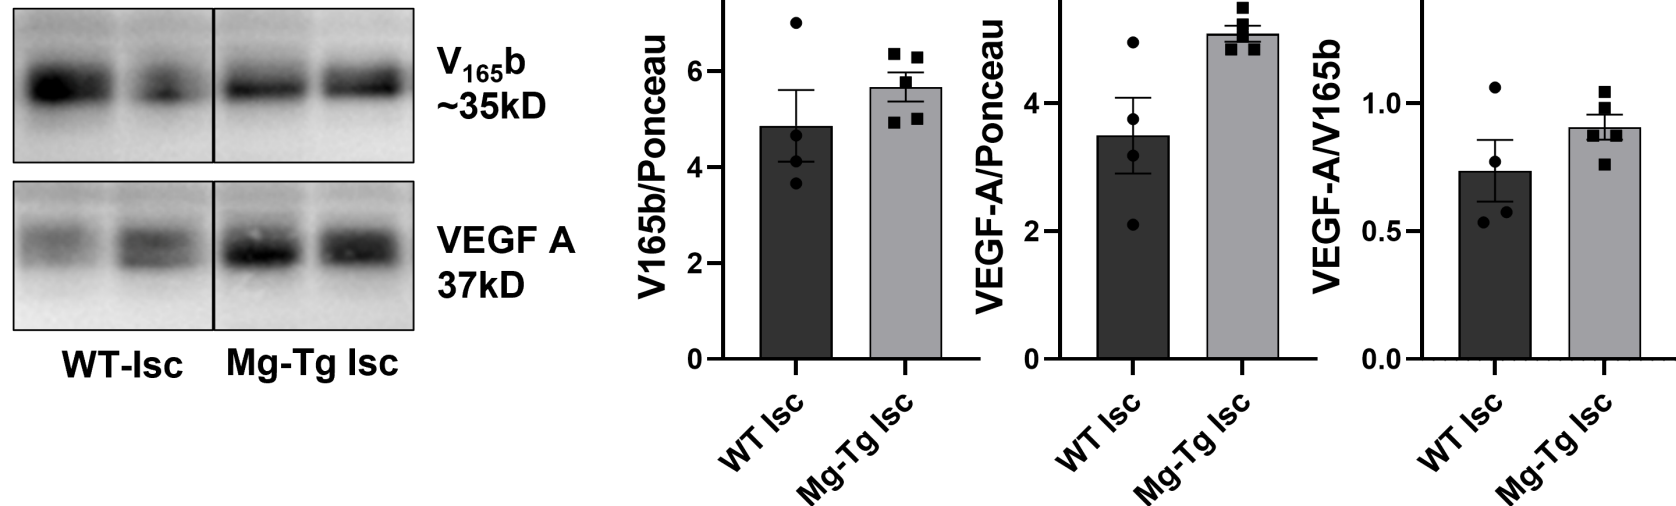

**B**

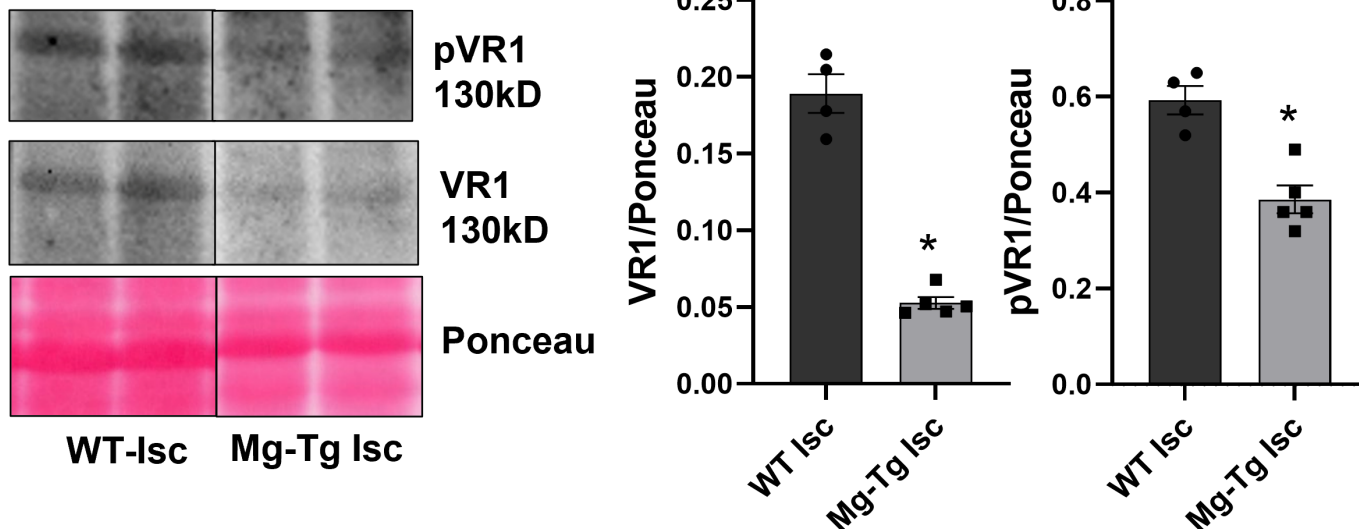

**Figure S11.** VEGF<sub>165</sub>b, VEGF-A levels, and VEGFR1 activation in Myoglobin-transgenic (Mg-Tg) mice in experimental PAD. Immunoblot analysis of A) VEGF<sub>165</sub>b (V<sub>165</sub>b) and total VEGF-A levels; B) pVR1 and VR1 in wild type controls and Mg-Tg mice ischemic gastrocnemius muscle at day-3 post-HLI. n≥4, Unpaired T-test. \*P<0.05 considered significant. Data Mean±SEM

## Figure S12: Mg-Tg-HLI

A

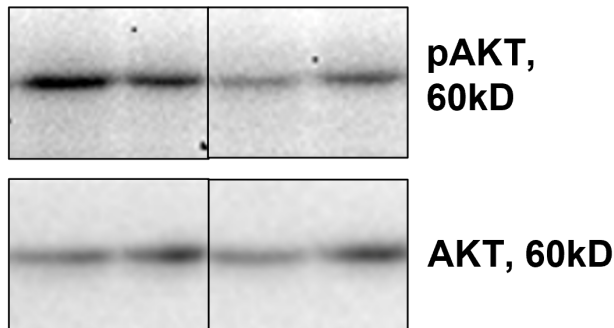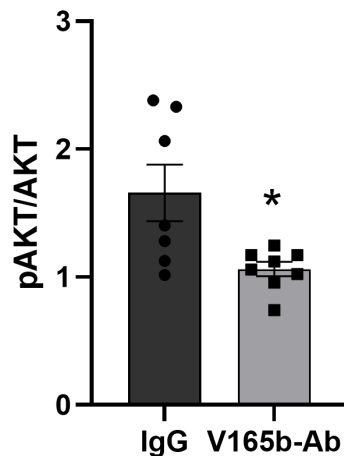

B

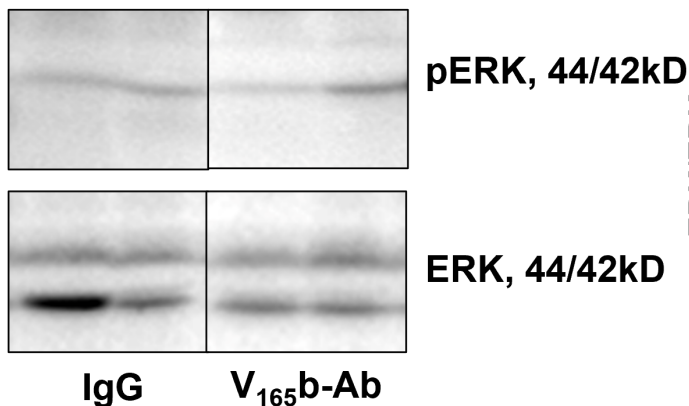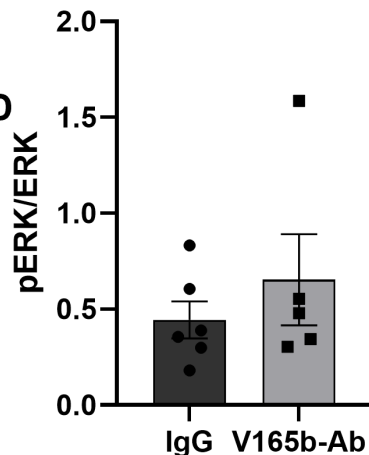

**Figure S12.** VEGF<sub>165</sub>b inhibition decreased AKT activation in Mg-Tg mice ischemic muscle: Western blot analysis of A) pAKT, AKT and B) pERK, ERK in IgG or VEGF<sub>165</sub>b-Ab treated Mg-Tg mice ischemic muscle. n=7, Unpaired T-test. \*P<0.05 considered significant. Data Mean±SEM



**Figure S13**

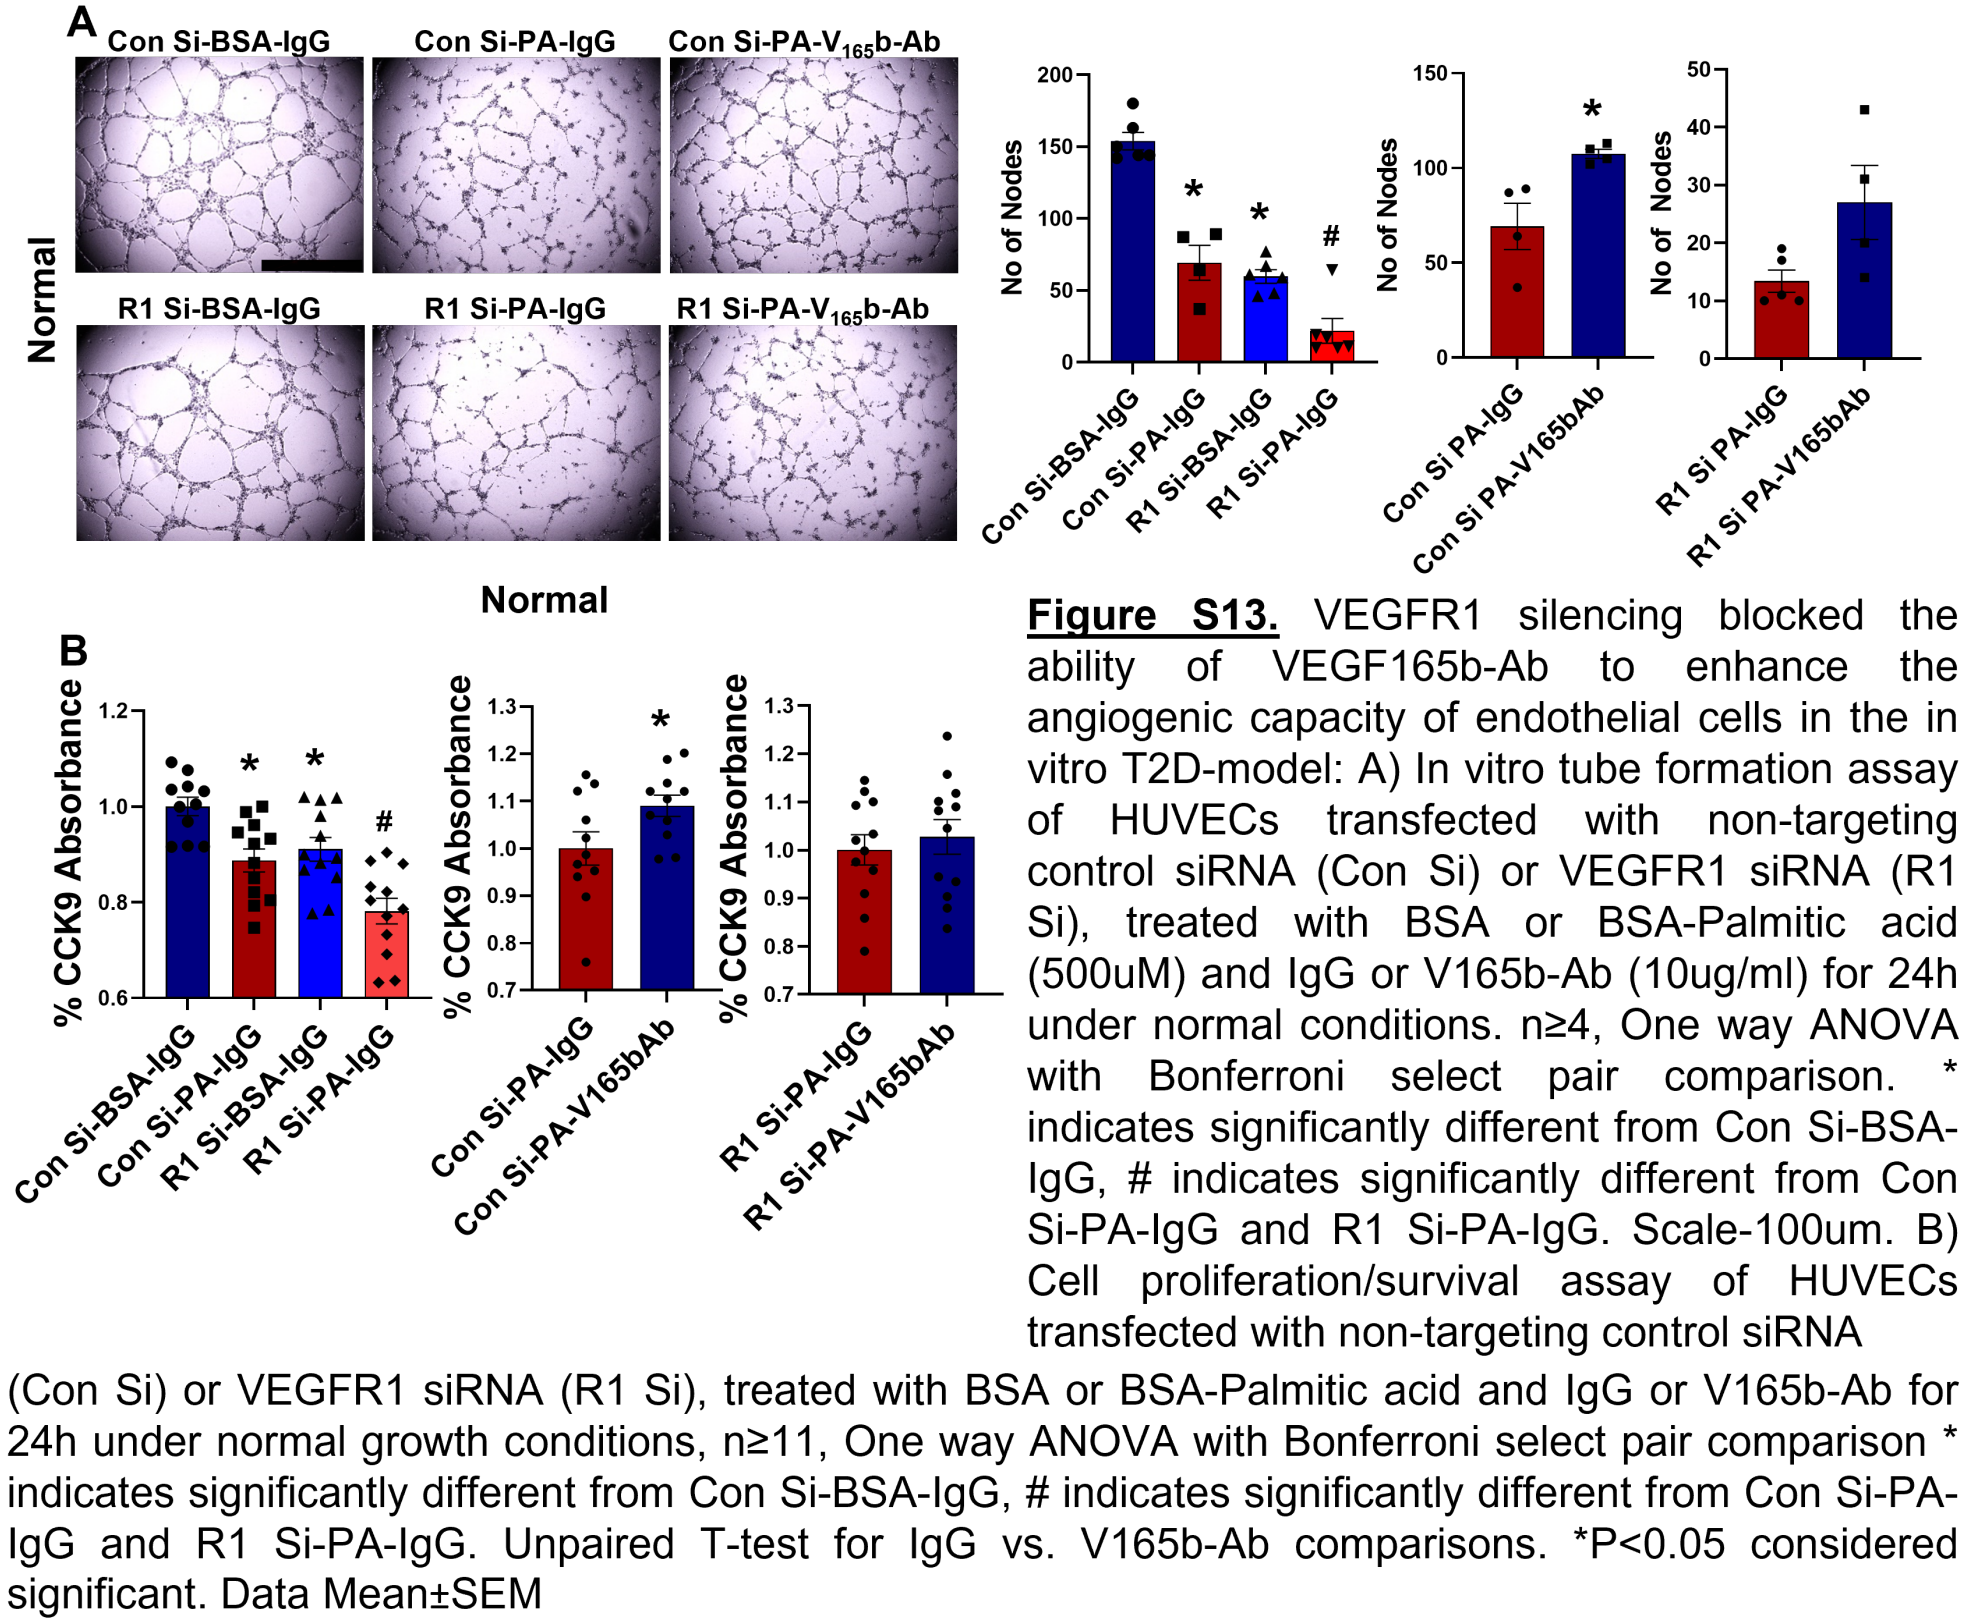

# Figure S14

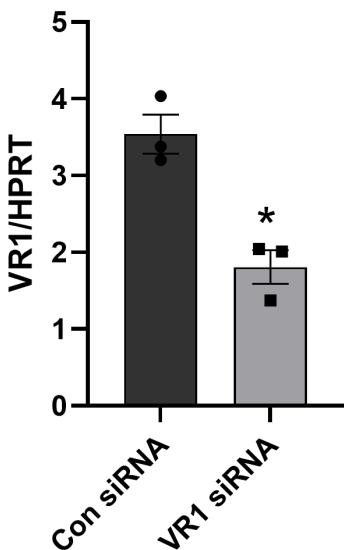

**Figure S14.** qPCR confirming VEGFR1 silencing in HUVECs transfected with VEGFR1 siRNA: qPCR analysis of VEGFR1 expression in non-targeting siRNA or VEGFR1 siRNA treated HUVECs. n=3, Unpaired T-test. \*P<0.05 considered significant. Data Mean±SEM

## Figure S15

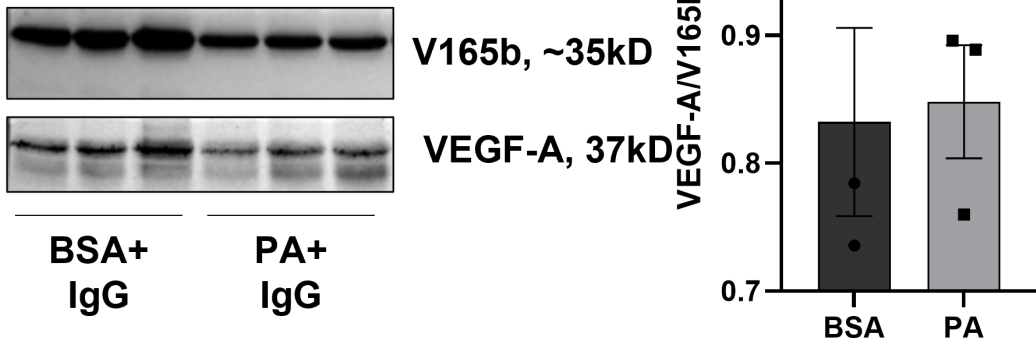

**Figure S15.** Palmitic acid did not induce significant differences in VEGF<sub>165</sub>b vs. VEGF-A levels in HSS HUVECs: Western blot analysis of VEGF<sub>165</sub>b and VEGF-A in HUVECs treated with BSA or PA under HSS conditions. n=3, Unpaired T-test. \*P<0.05 considered significant. Data Mean±SEM

**Figure S16**

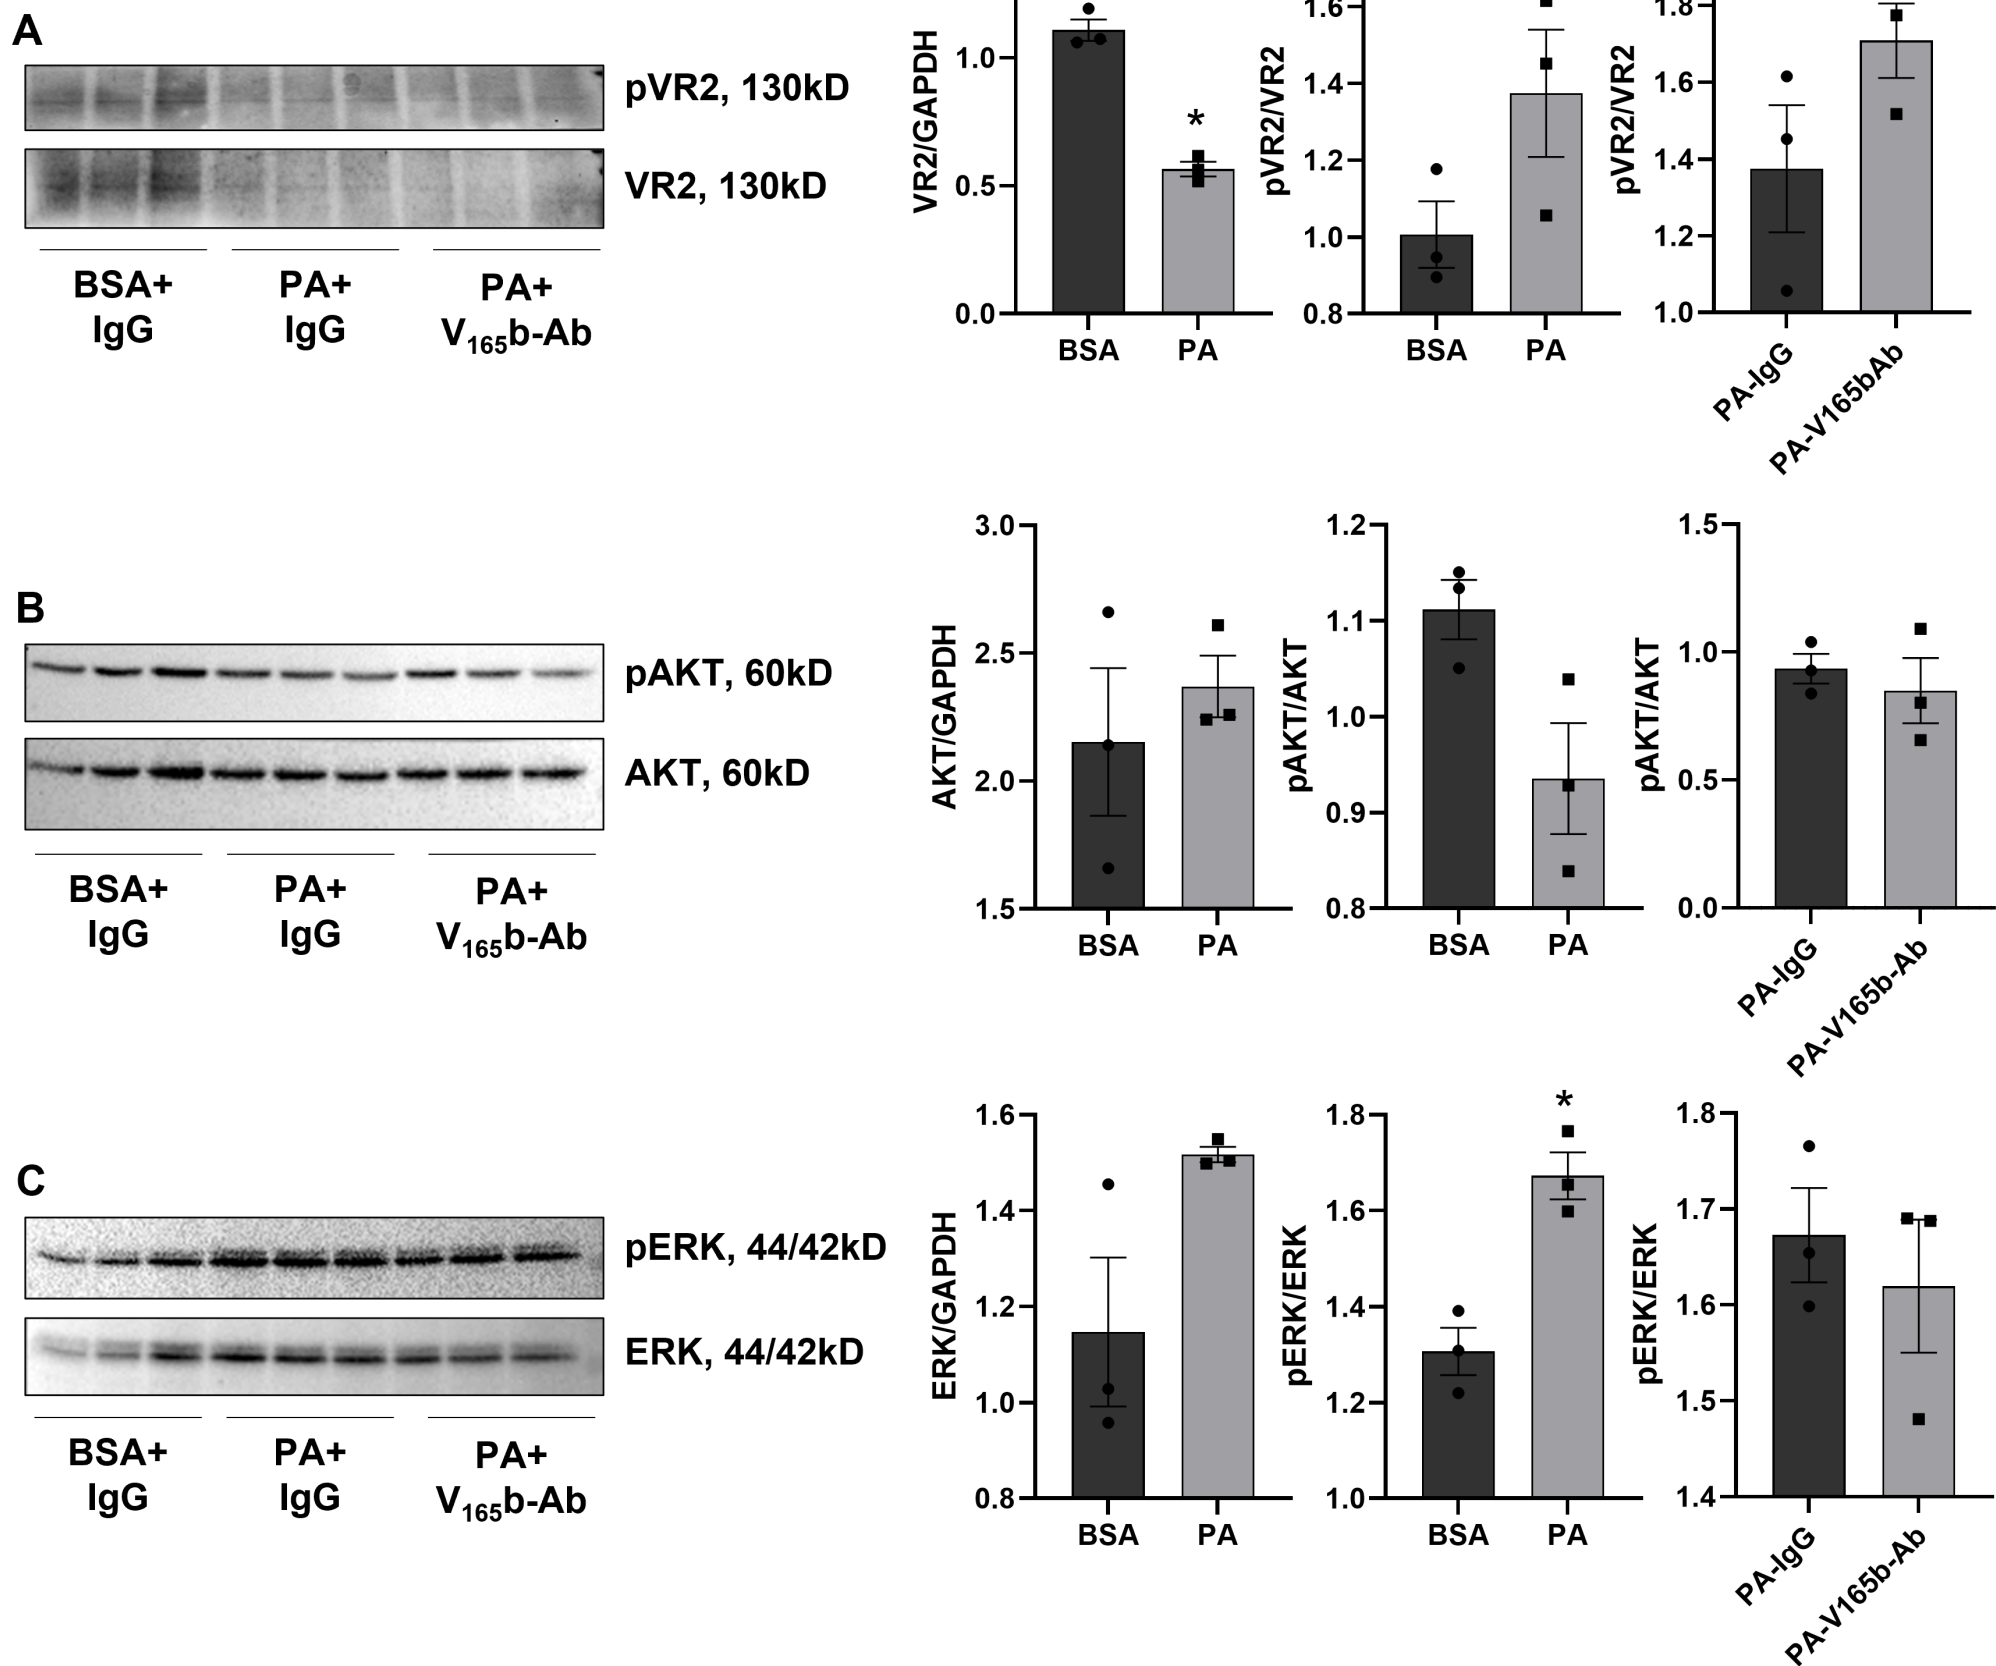

**Figure S16.** VEGF165b-inhibition does not induce VEGFR2-signaling in in vitro diabetic-PAD model: Western blot analysis of A) pVR2/VR2, B) pAKT/AKT, C) pERK/ERK in HSS-HUVECs treated with BSA+IgG, PA+IgG, PA+V165b-Ab. n=3, Unpaired T-test. \*P<0.05 considered significant. Data Mean±SEM

Full westerns in Fig-1

A: Normal HUVECs

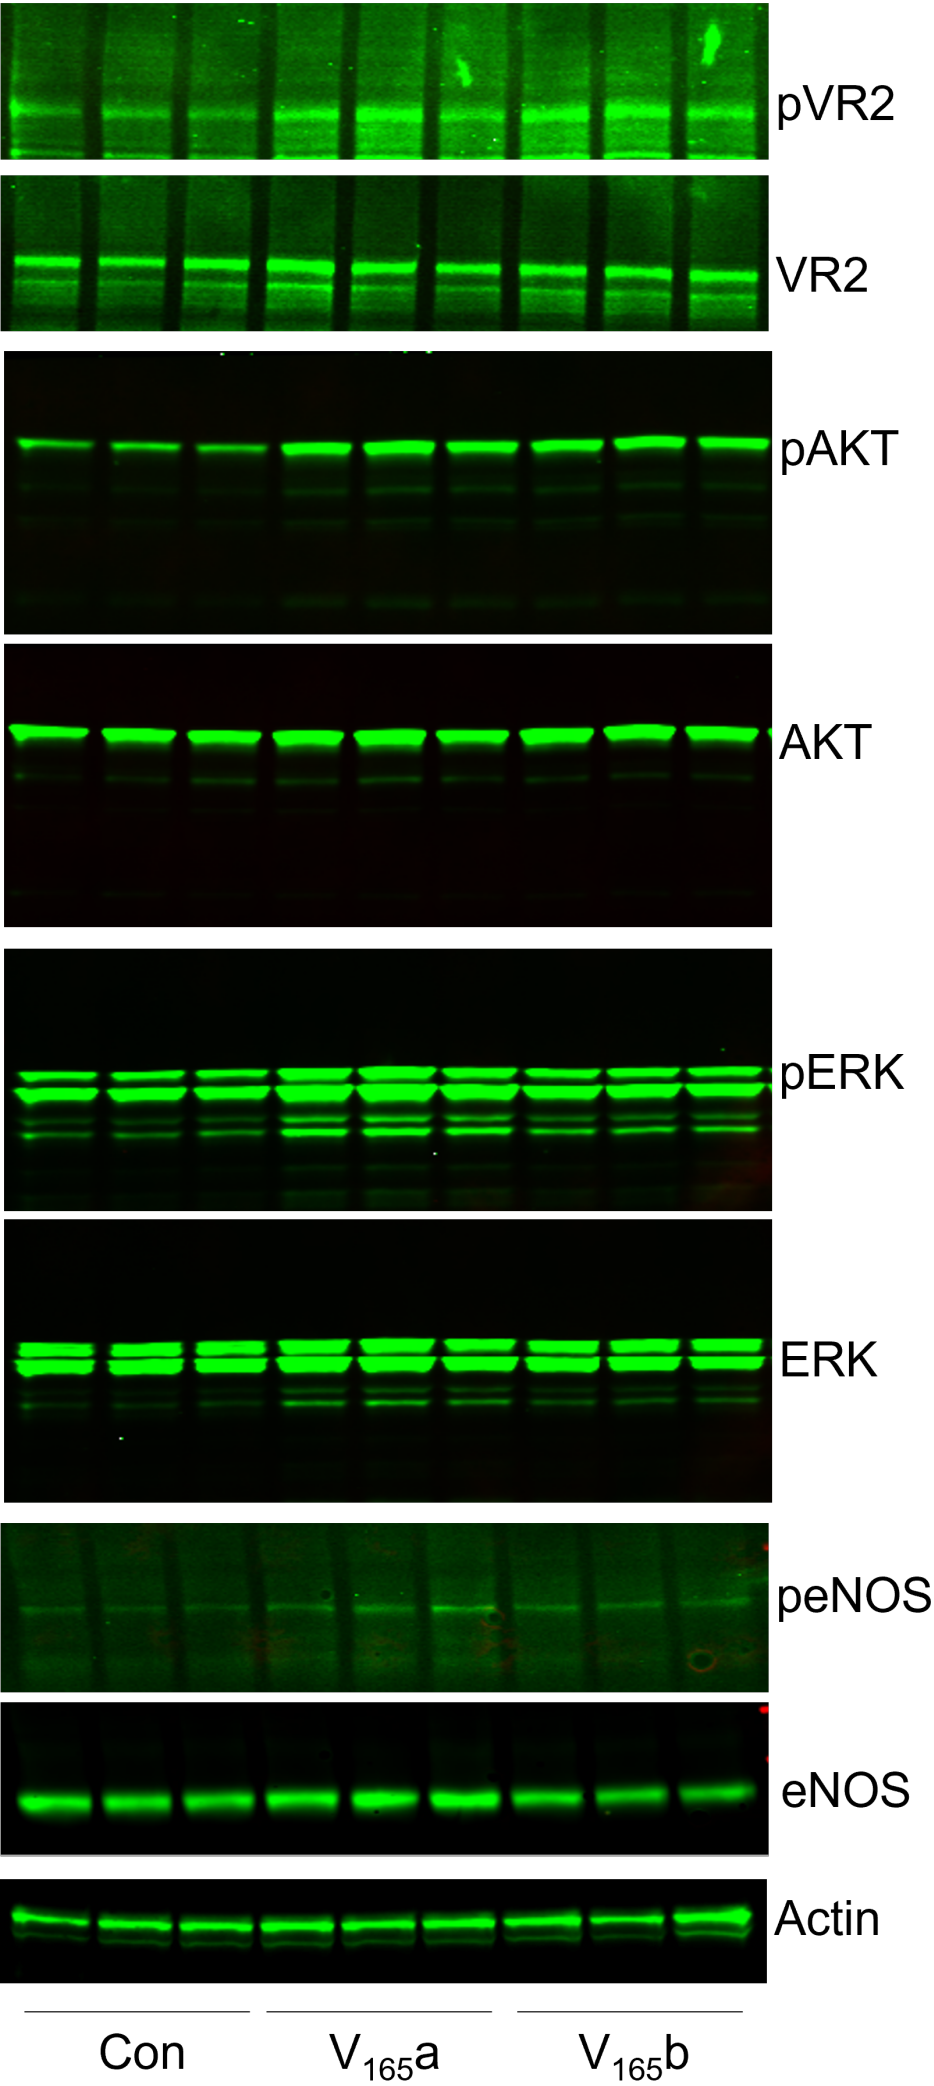

B: HSS HUVECs

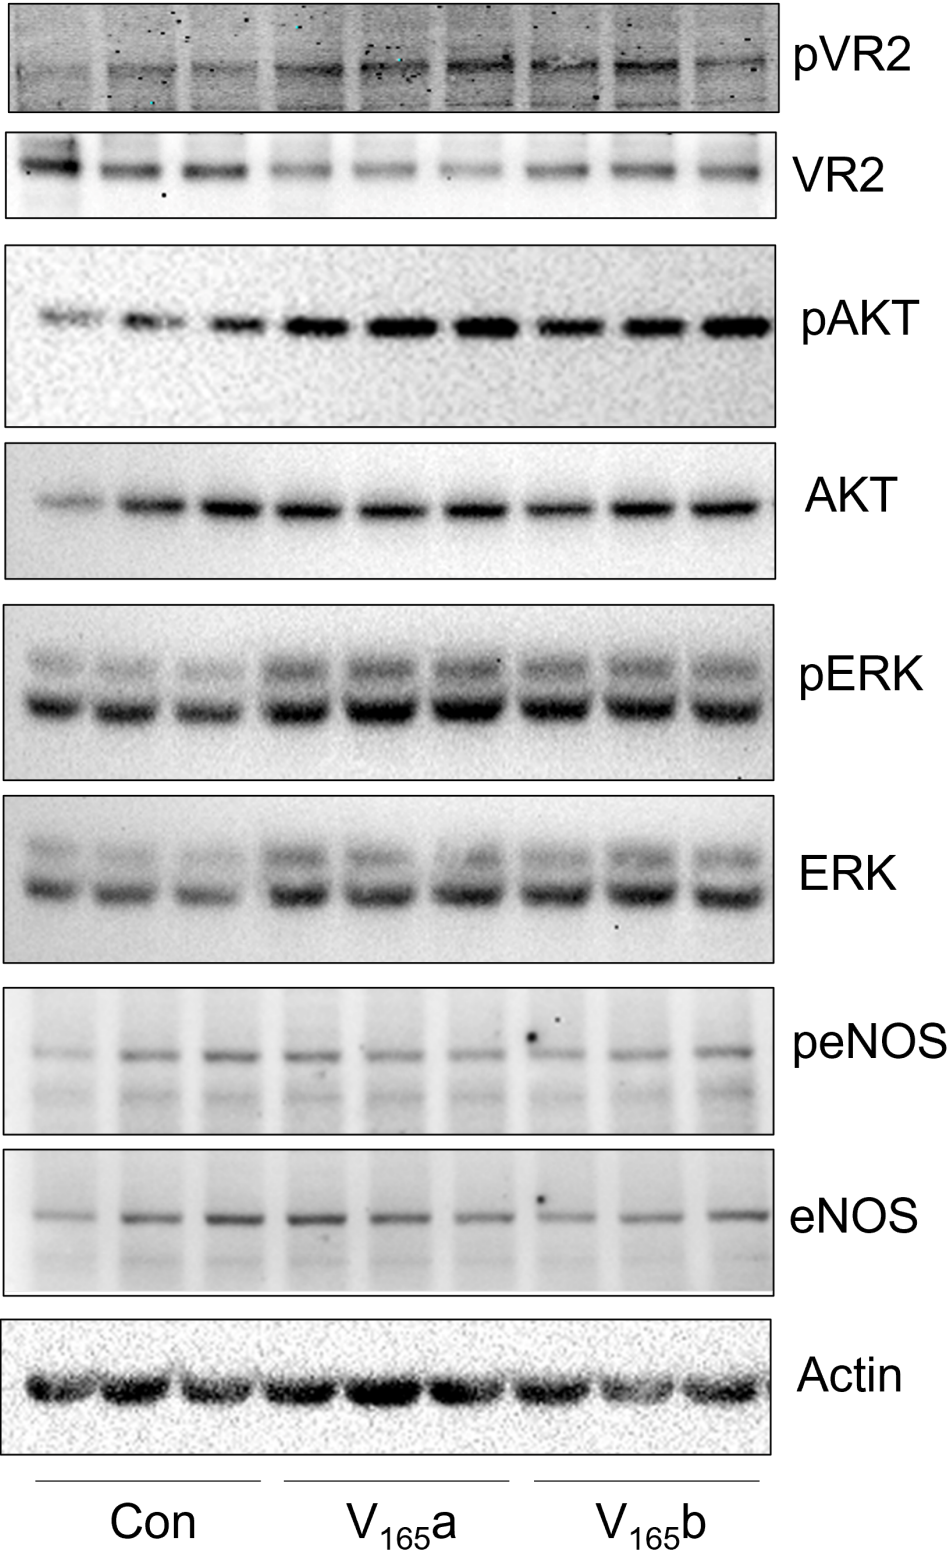



Full westerns in Fig-2

A: HSS HUVECs

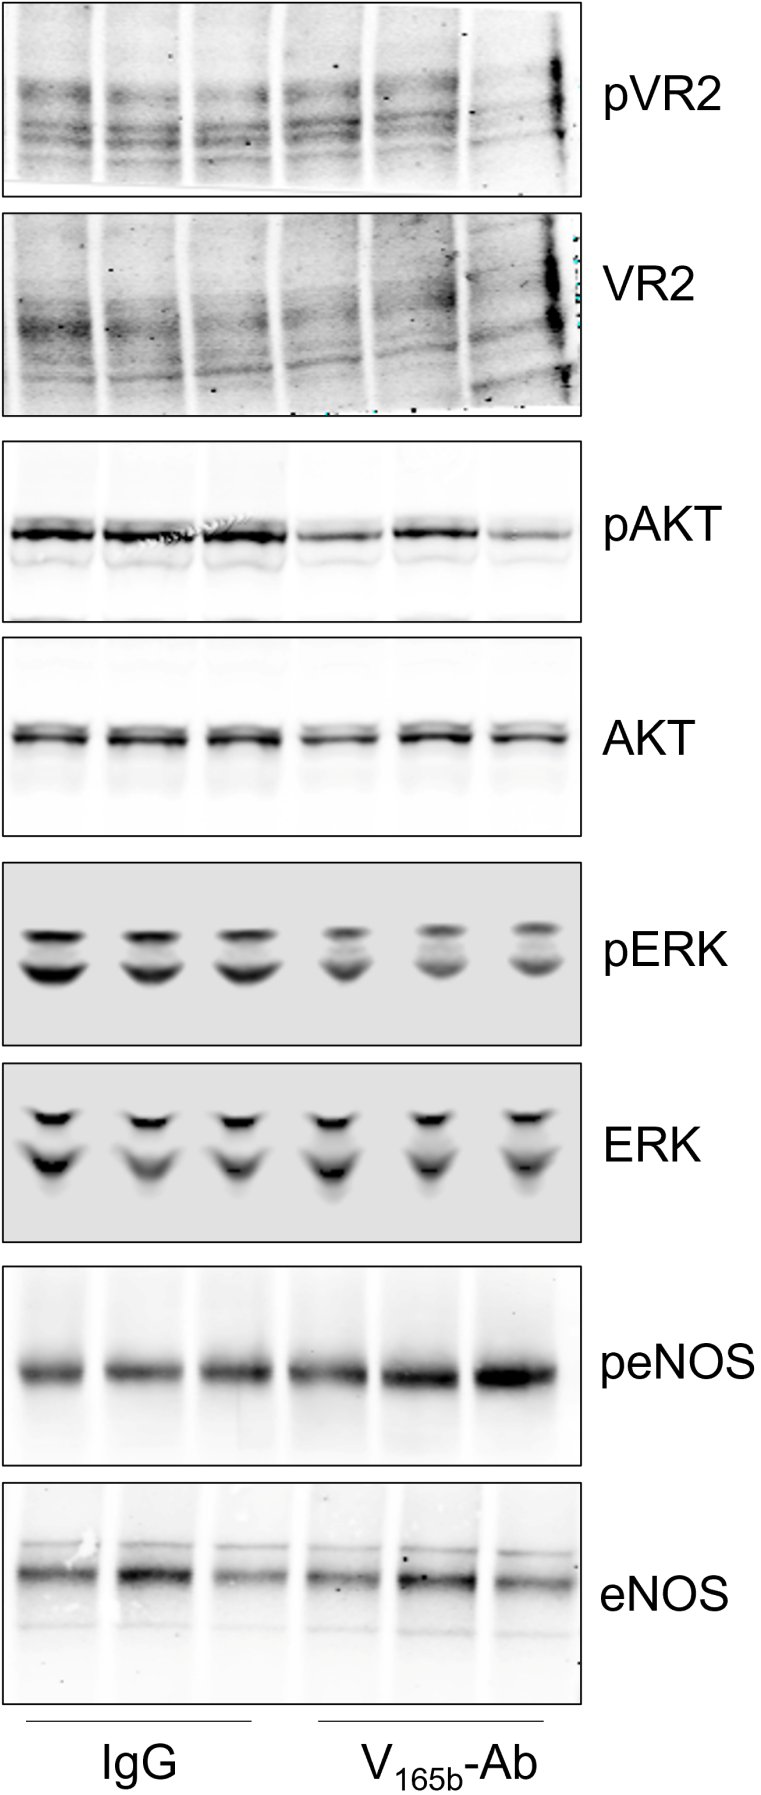

B: HSS MVECs

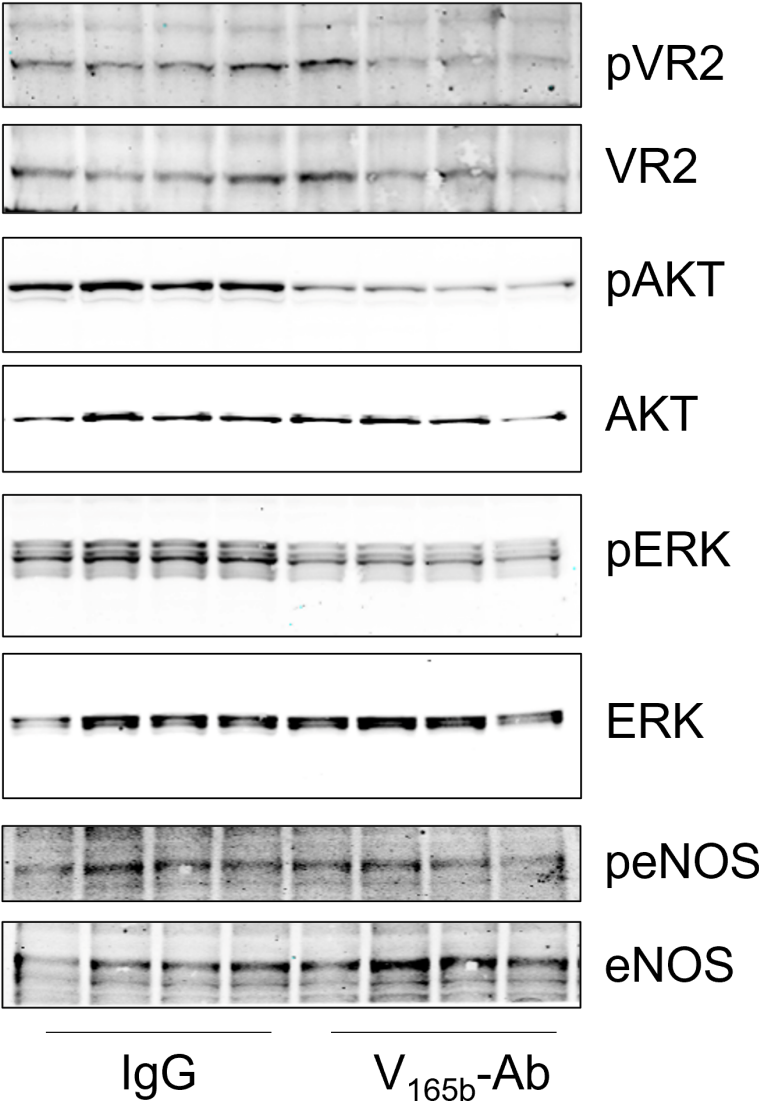

C: Ischemic Muscle

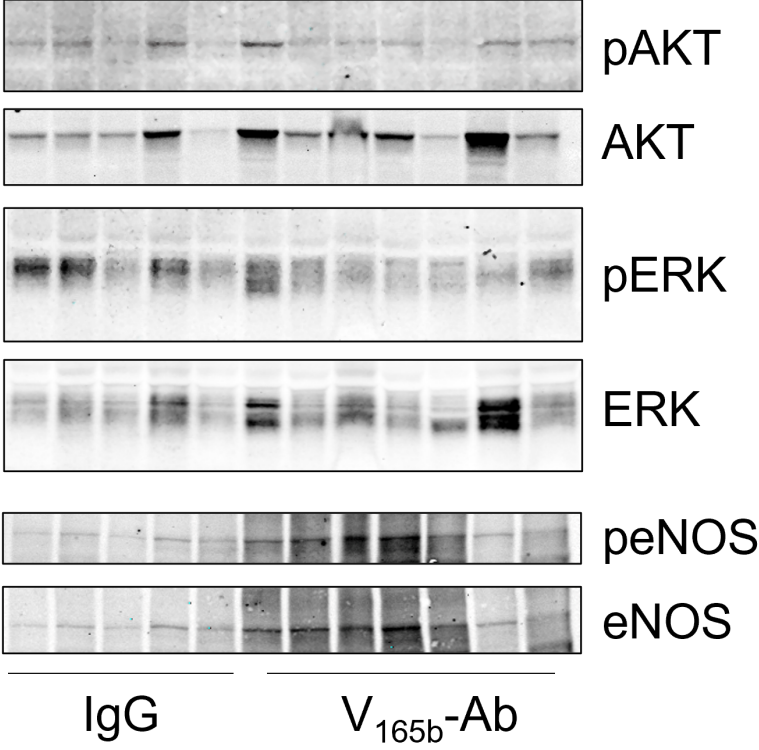

D: HSS HUVECs

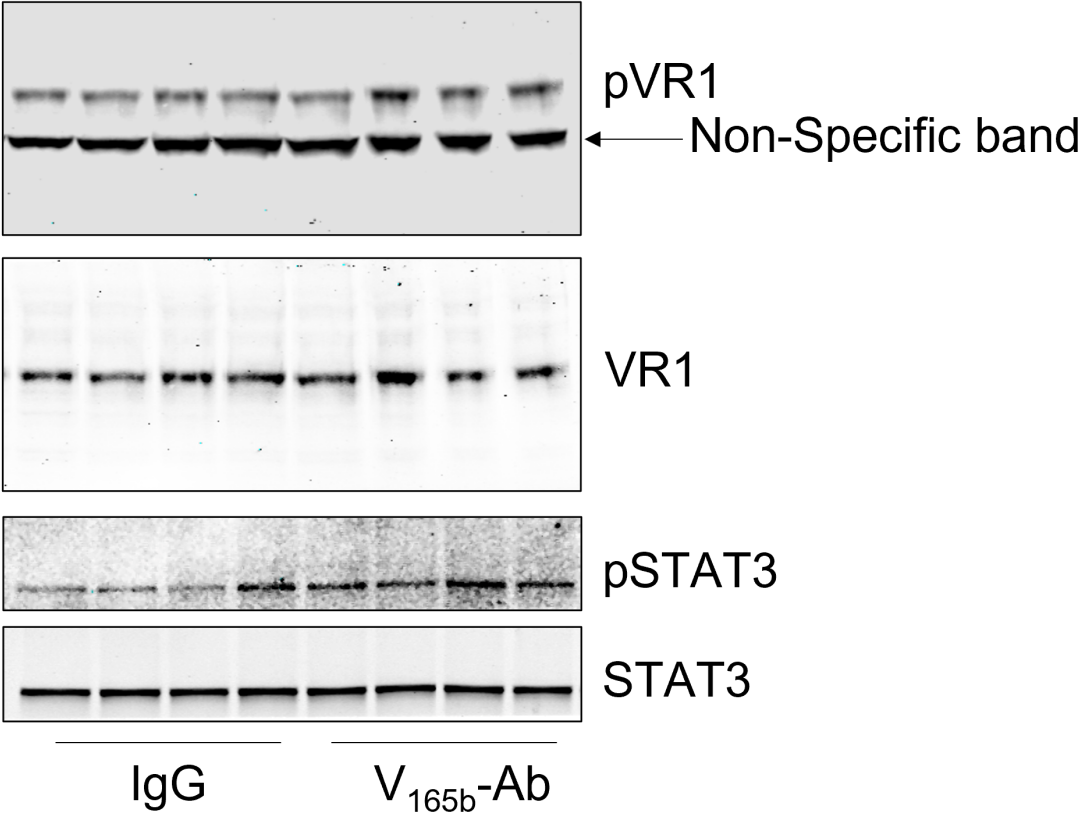

E: HSS MVECs

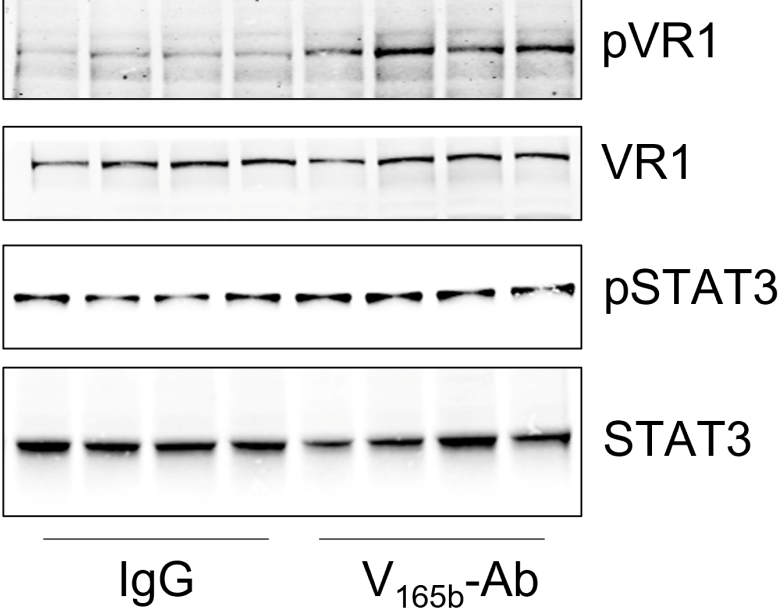

Full westerns in Fig-3

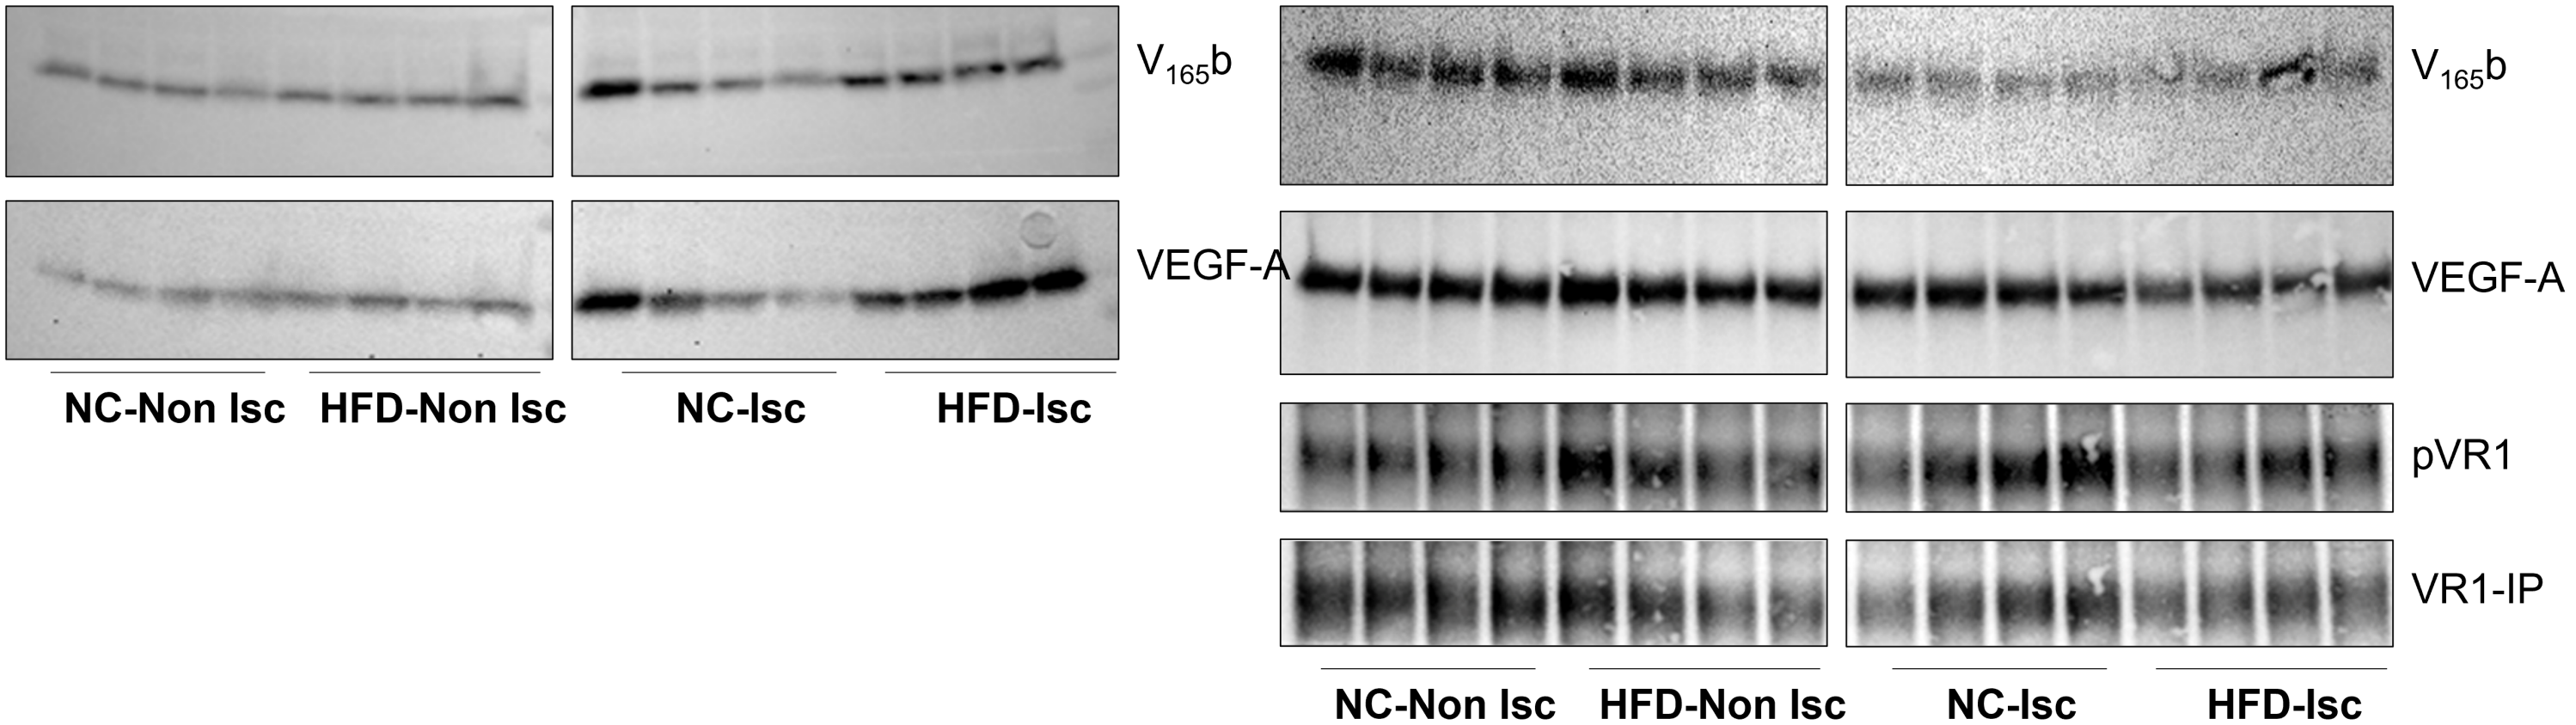

## Full westerns in Fig-4

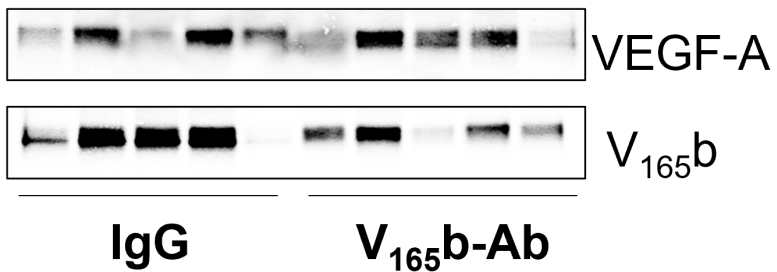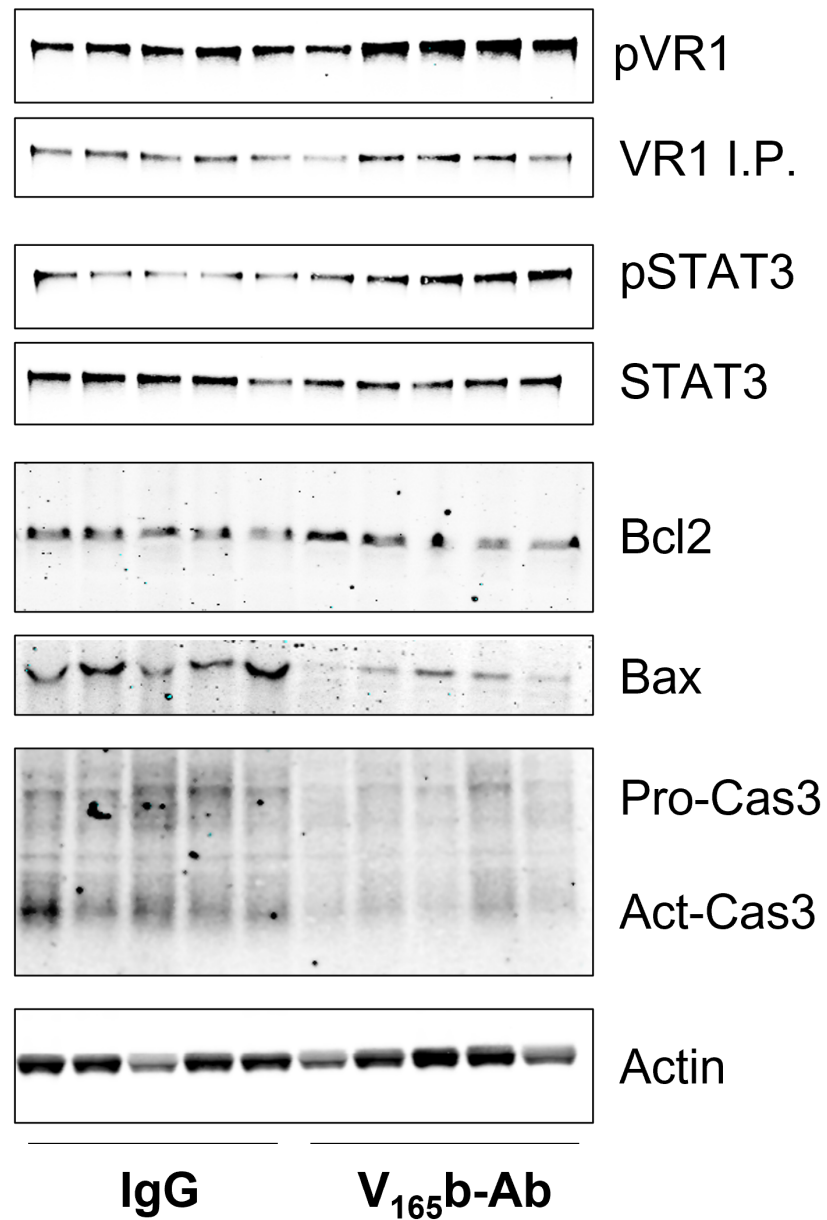



# Full westerns in Fig-5

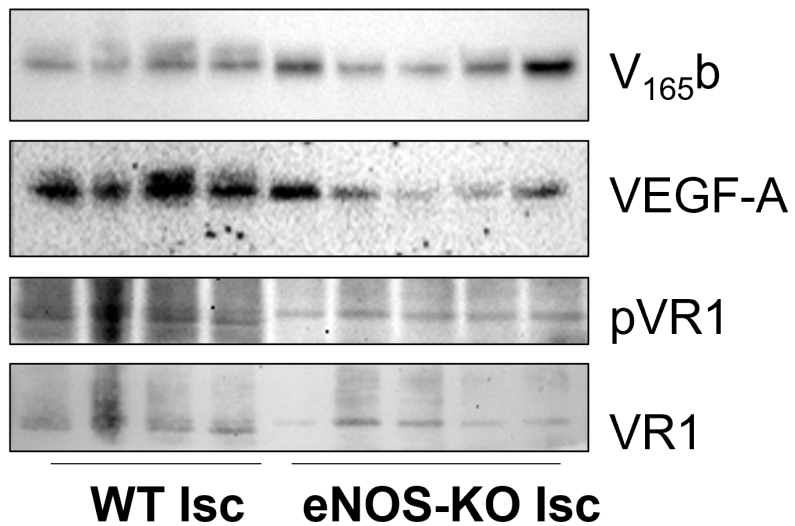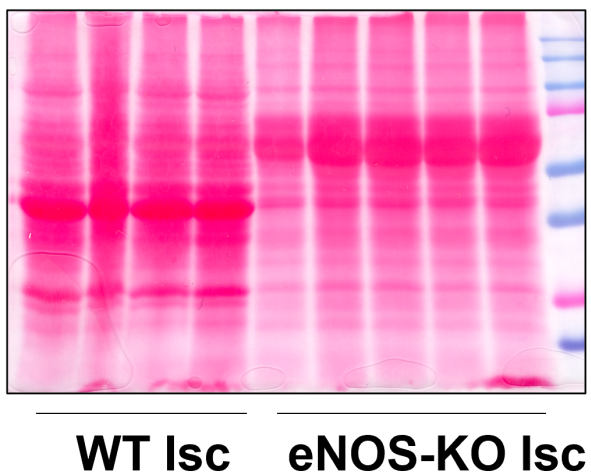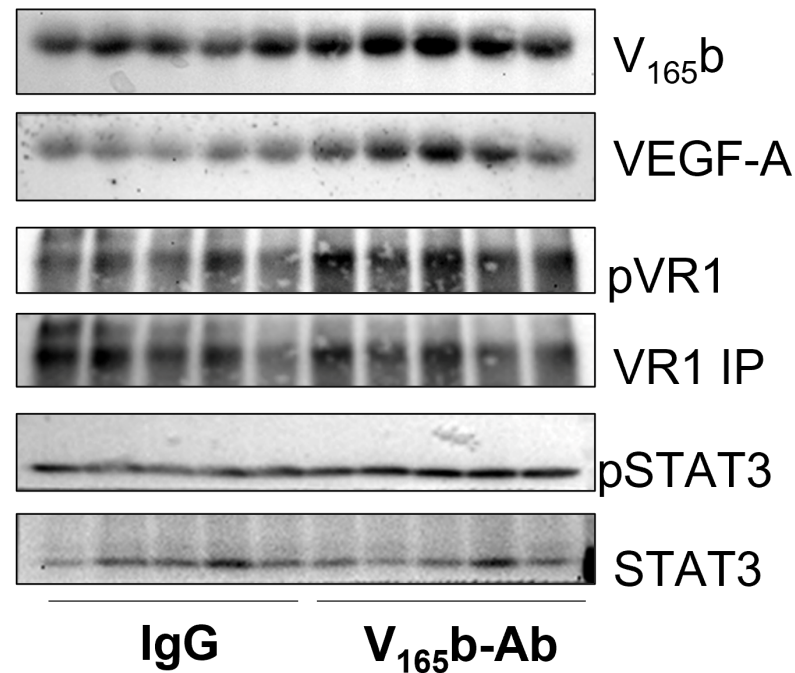

# Full westerns in Fig-6

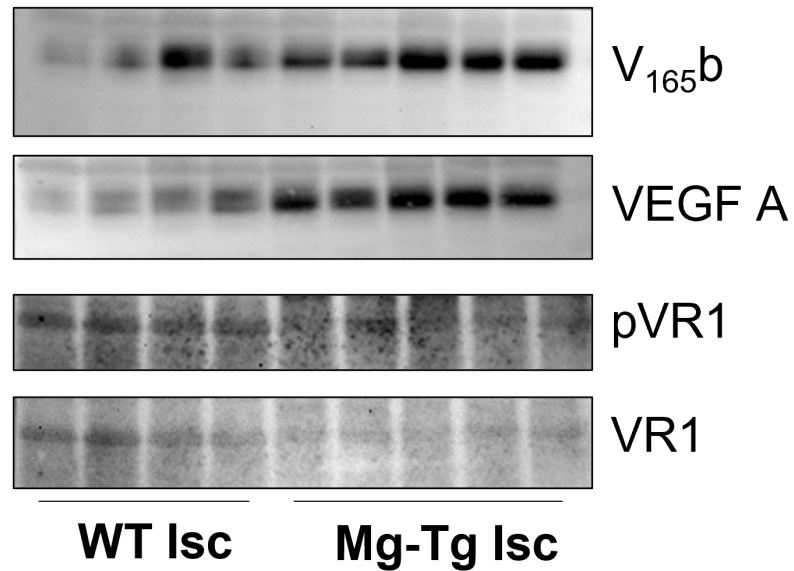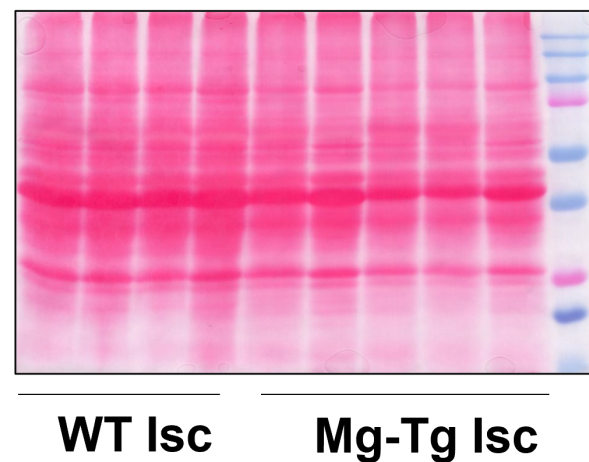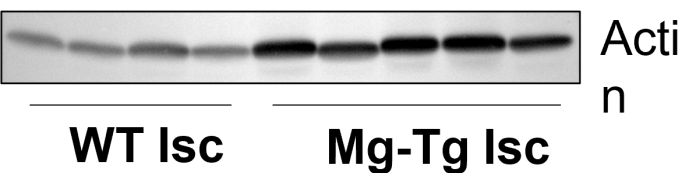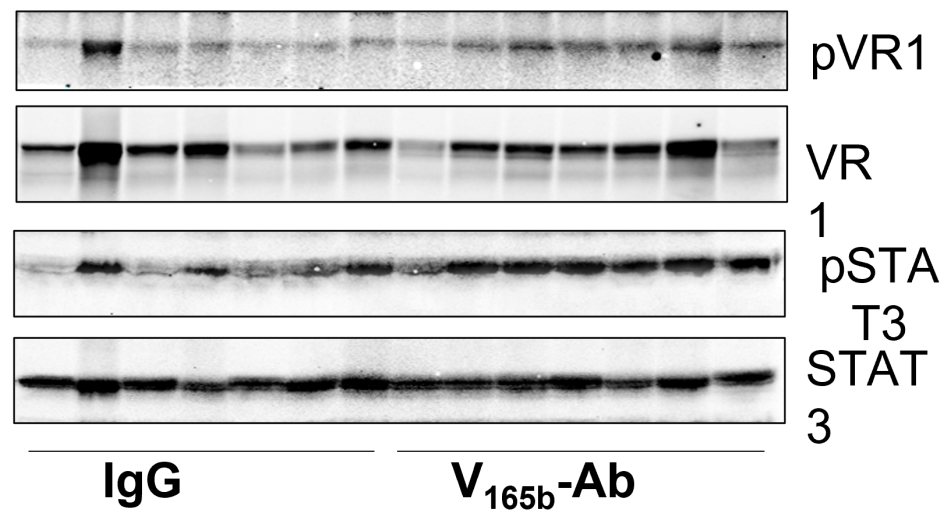

# Full westerns in Supplement Fig-3: T2D-HLI

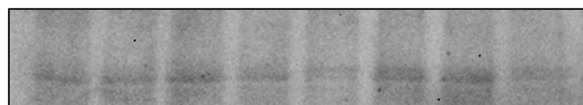

pVR1

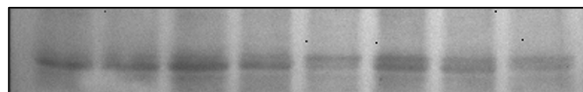

VR1

NC Isc

HFD Isc

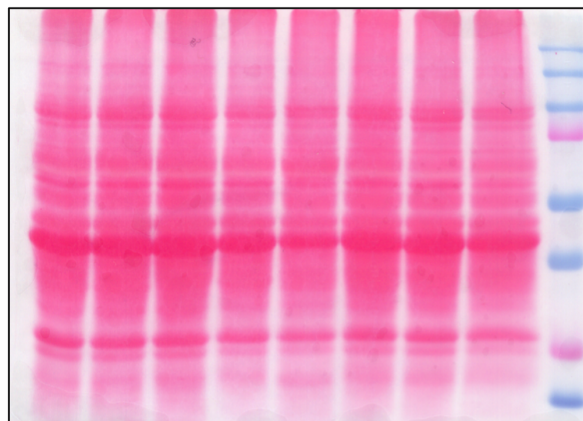

NC Isc

HFD Isc

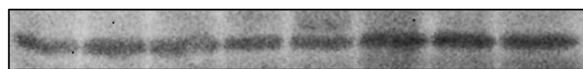

Acti  
n

NC Isc

HFD Isc

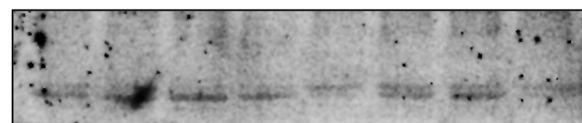

pVR2

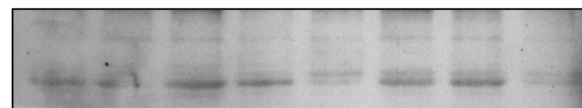

VR2

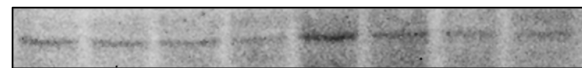

pAKT

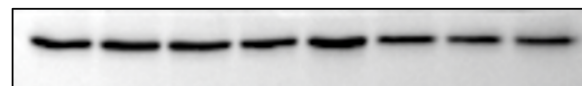

AKT

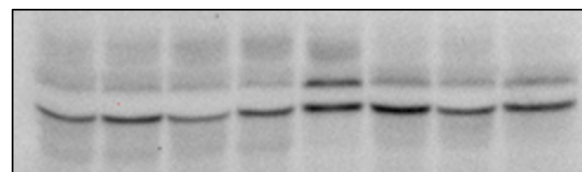

pERK

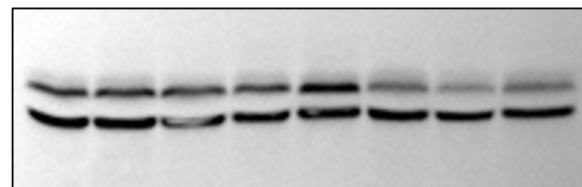

ERK

NC Isc

HFD Isc

# Full westerns in Supplement Fig-4: T2D-HLI

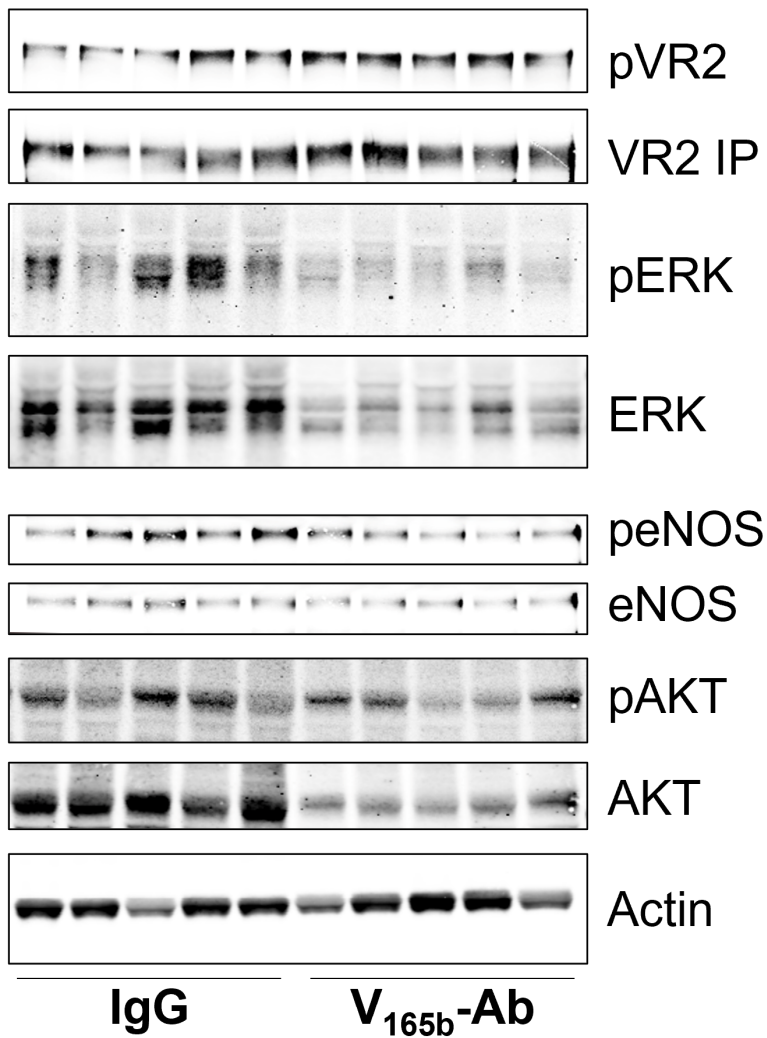



# Full westerns in Supplement Fig-7: Mg-Tg-HLI

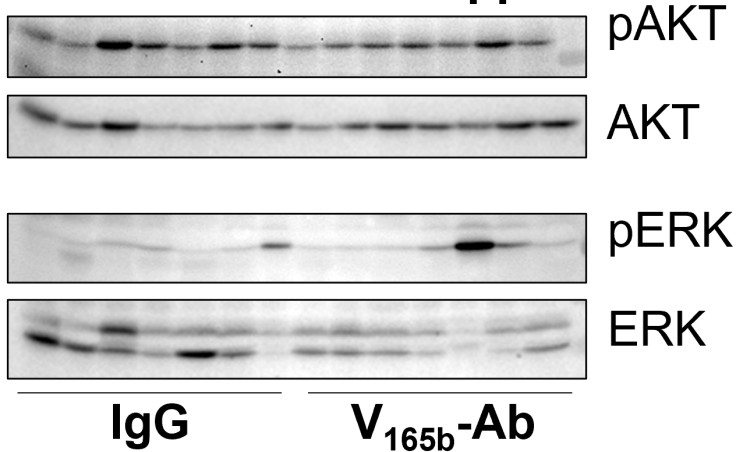

Supplement: s1 [file s1]
